# Supplementary material for: Genome-Wide Homozygosity Mapping Reveals Genes Associated With Cognitive Ability in Children From Saudi Arabia
Source: PubMed Central journal article supplement (PMC6759945; doi:10.3389/fgene.2019.00888), 2019-09-18
Supplement: DataSheet_1.pdf [file DataSheet_1.pdf]

## *Supplementary Material*

# **Genome-wide Homozygosity Mapping Reveals Genes Associated with Cognitive Ability in Children from Saudi Arabia**

**Sergey A. Kornilov, Mei Tan, Abdullah Aljughaiuman, Oksana Yu. Naumova, Elena L. Grigorenko\***

\* **Correspondence:** Corresponding Author: elena.grigorenko@times.uh.edu

### **1 Supplementary Analysis of Background Relatedness in the Study Sample**

Additional analyses were undertaken to ensure that the results are stable to the presence of closely related individuals in the sample – i.e., although mixed linear modeling adequately represented sample structure, including both admixture and relatedness, analyses of sROH associations were carried out using principal component regression, and analyses of ROH and CNV burdens' contribution to cognitive ability were modeled using quantile regression. Correspondingly, we evaluated sample relatedness using a combination of techniques.

Post-QC sample genotypes were phased using BEAGLE v. 3 (Browning and Browning, 2009) with default settings. Genetic locations for SNP markers in cM were acquired from the Rutgers Combined Linkage-Physical Map v.3 ([http://compgen.rutgers.edu/rutgers\\_maps.shtml](http://compgen.rutgers.edu/rutgers_maps.shtml)) (Matisse et al., 2007).

Relatedness was evaluated using two complimentary approaches. Phased genomes were subjected to Identity by Descent (IBD) estimation using FISHR2 (Bjelland et al., 2017), a recently developed algorithm for detection of IBD segments between individuals from genome-wide SNP data that utilizes a modified version of GERMLINE (Gusev et al., 2009) as an initial screen for candidate IBD segments and then stitches together contiguous segments separated artificially due to SNP or phase errors while differentiating between locations possibly inconsistent with IBD inheritance due noise in the data as opposed to lack of truly IBD signal.

Analyses began with the identification of long (> 2.0 cM) segments with a minimum of 25 SNPs detected with a window of 50 and a gap parameter of 5 markers and FISHR2 manual-recommended threshold parameters for error values. FISHR2 identified 158,973 IBD segments in the data, ranging from 2 to 40.96 cM in length, with the vast majority encompassing less than 5 cM (Mean = 2.56, SD = 0.85).

We then estimated pairwise relatedness using IBD2 segment data obtained via FISHR2 using ERSA 2.1 (Huff et al., 2011). ERSA is a maximum-likelihood method for estimation of recent shared ancestry and can accurately infer relatedness between pairs of individuals with power of nearly 100% for close relatives (1<sup>st</sup> through 5<sup>th</sup>-degree) and substantial power to detect even more distant relationships. Analyses were performed using default ERSA settings.

ERSA identified 41 unique pairs of relationships between 34 individuals total: 11 third-degree, 1 fourth-degree, 7 fifth-degree, 10 sixth-degree, and 12 seventh-degree relatives. Given the limited

resolution of the array and lack of genetic material sharing between very distant relatives, individuals identified as having 8-th and 9-th degree relatives were considered unrelated. Figure S6 and S7 shows the distributions of IBD segment sharing in unrelated vs related individuals in the sample.

Sensitivity analyses revealed that:

1) relatedness did not affect latent class analysis results, and no class was overrepresented among related individuals in the sample (among related individuals, n=1 belong to Class 1, n=4 to Class 2, n=11 to Class 3, n=6 to Class 4, and n=8 to Class 5);

2) there were no related individuals among carriers of sROHs reported in the main section of the manuscript as being associated with cognitive ability;

3) removing related individuals reduced the statistical significance of the  $f_{ROH(C)}$  effect for Classes 1 and 2 to a marginal value of  $p=0.0715$ ;

4) removing related individuals did not affect the pattern of the quantile regression solutions for Class 3 as well as for the combined Class 4 and 5.

## **2 Supplementary Analysis of Copy Number Variation Association with Cognitive Ability in the Study Sample**

Association analysis was performed using the approach parallel to that of ROH analyses reported in the main text of the article – i.e., separately for gain and loss events, we computed a set of disjoint surrogate CNV fragments (sLOSS and sGAIN for loss and gain events, respectively) that accounted for partial overlaps between called segments in the sample.

We specifically focused on CNVs that overlapped with known protein-coding genes (242 sGAIN segments, 842 sLOSS segments). Association with covariate and PC-adjusted phenotypes was performed using linear regression, and P-values were corrected for number of comparisons using the Benjamini-Hochberg's correction.

No surrogate CNV regions survived corrections for multiple testing (Manhattan plots and QQ plots are presented in Figures X and Y). After further reducing the number of multiple comparisons by excluding rare sCNVs present in less than 1% of the samples, no sCNVs (out of 100 sLOSS and 50 sGAIN segments) survived corrections for multiple testing.

Table S5 presents nominally significant sLOSS and sGAIN associations at uncorrected  $p < 0.05$ .

### 3 Supplementary Analysis of Ancestry in Children from Saudi Arabia

The analyses reported in the main text either adjusted phenotypes for five top genetic components estimated from the genetic data, or directly accounted for admixture by modeling pairwise kinship. Nonetheless, we performed an additional set of analyses aimed at providing more comprehensive information about the ancestral composition of the sample.

This analyses relied on the availability of two additional datasets: (1) a subset of  $n=176$  individuals of Middle-Eastern ancestry (Bedouin, Druze, Mozabite, and Palestinian) from the Human Genome Diversity Project (Cann et al., 2002) (HGDP; data publicly available at <http://www.hagsc.org/hgdp/files.html>) that provides data on  $n=1,043$  individuals of varying ancestry genotyped using Illumina's 650Y microarray panel; (2) a subset of the Qatar genome project dataset (Rodriguez-Flores et al., 2016) (DGMQ) that is comprised of whole genome-sequencing (WGS) data on  $n=108$  unrelated natives of Arabian Peninsula, including  $n=56$  of indigenous Arab ancestry (the data were graciously provided by Dr. Rodriguez-Flores from Cornell University).

For the HGDP dataset, we performed an additional QC of SNP markers following standard QC procedures using GoldenHelix SNP & Variation Suite. For the DGMQ dataset, VCF genotype calls were imported into SNP & Variation Suite and annotated against known dbSNP polymorphisms prior to further analyses. Ancestry evaluation was based on the set of  $k=147,057$  SNP markers common to the two genotyping platforms that were also called in the DGMQ dataset and passed the QC in all three samples. Prior to the analyses, genotypes from the three different platforms were harmonized to the common marker map (we used the HumanCoreExome as the baseline map) to avoid strand alignment and genotype conversion ambiguity using Genotype Harmonizer (Deelen et al., 2014). Missing genotypes were imputed using the weighted  $k$  nearest neighbor approach (Schwender and Ickstadt, 2008) as implemented in the *scrime* package for R.

Ancestry evaluation was performed using two complimentary approaches. First, we applied the community-oriented network estimation (CONE) (Kuismin et al., 2017) method to the data. CONE is a recently developed method for ancestry and admixture evaluation that utilizes generalized linear model with LASSO regularization to infer relationships between individuals and populations from SNP-level data, and is a network-theory based method of population structure inference that does not rely on model parameters such as the prior number of subpopulations. Second, we used a maximum-likelihood (i.e., model-based) method for admixture analysis as implemented in ADMIXTURE (Alexander et al., 2009) software.

The neighborhood selection in CONE depends on the tuning/penalty parameter  $\lambda$ . Following Kuismin et al. (Kuismin et al., 2017) and Liu et al. (Liu et al., 2010), we chose to rely on the stability approach to regularization selection (StARS) to choose the most stable graph solution. StARS uses subsampling to measure uncertainty regarding the presence of edges between the nodes for each fixed value of  $\lambda$ . CONE performance was evaluated based on the examination of 100 different tuning parameter values in the range from 0.01 to 0.50 based on  $M=50$  subsamples.  $\lambda$  value of 0.06210204 was chosen after the examination of the tuning parameter performance (Supplementary Figure S3), and Fruchterman-Reingold algorithm was used to detect different communities among the nodes. The results of CONE analyses (Supplementary Figure S4) suggested the presence of substantial genetic flow between the studied population of children from Saudi Arabia, and the majority of examined populations of Middle Eastern ancestry with the exception of Mozabite

(HGDP). The majority of the samples clustered with the Bedoin and Qatari samples, and substantial flow was also established for groups of samples that were related to the Druze and Palestinian populations.

We also analyzed the data using ADMIXTURE with 5-fold cross-validation for the range of  $k$  admixture components (ancestral populations) ranging from 2 to 10 using the block relaxation algorithm with Quasi-Newton convergence acceleration. Cross-validation (CV) values were used to guide model selection, and additional analyses were performed using StructureSelector(Li and Liu, 2018). CV values were estimated at 0.5949 for  $k=2$ , 0.59301 for  $k=3$ , 0.59266 for  $k=4$ , **0.59260 for  $k=5$  (lowest)**, 0.59262 for  $k=6$ , 0.59307 for  $k=7$ , 0.59619 for  $k=8$ , 0.59714 for  $k=9$ , and 0.59758 for  $k=10$ . Population structure plots were obtained using StructureSelector's implementation of CLUMPAK(Kopelman et al., 2015) (see Supplementary Figure S5). The results of this analysis are consistent with the CONE-based results and suggest significant admixture in the presence of 5 ancestral populations, with the highest similarity observed between the study sample from Saudi Arabia and the sample of Qatar Genome Project (DGMQ)

#### 4 Supplementary Enrichment Analysis of GO Terms and Pathways for Genes Associated with Cognitive Ability in the Study Sample

Enrichment analysis was performed for 2,542 genes identified in gene-based association analyses and 1,266 genes located within the sROHs that showed nominally significant ( $p < 0.05$ ) evidence for association with any of Aurora ability scores using PantherDB (<http://www.pantherdb.org>). Statistical overrepresentation tests using Fisher's exact p-value estimation with FDR correction were computed for Panther pathways, GO molecular function and GO biological process terms.

##### 1. sROH-based associations ( $p < 0.05$ )

- 1.1. **Pathway analysis** identified two over-represented pathways in sROH associations:
  - 1.1.1. *cadherin signaling* pathway (3.60 fold enrichment,  $P = 1.57 \times 10^{-9}$ ,  $P_{\text{FDR}} = 2.56 \times 10^{-7}$ ) and
  - 1.1.2. *Wnt-signaling* pathway (1.98 fold enrichment,  $P = 1.89 \times 10^{-4}$ ,  $P_{\text{FDR}} = 1.54 \times 10^{-2}$ )
- 1.2. **GO molecular function** terms over-represented in the sROH gene list set
  - 1.2.1. *calcium ion binding* (1.84 fold enrichment,  $P = 8.68 \times 10^{-7}$ ,  $P_{\text{FDR}} = 4.05 \times 10^{-3}$ ) and
  - 1.2.2. *protein binding* (1.12 fold enrichment,  $P = 3.82 \times 10^{-6}$ ,  $P_{\text{FDR}} = 5.94 \times 10^{-3}$ ).
- 1.3. **GO biological process** analyses also revealed a significant over-representation of genes involved in
  - 1.3.1. *hemophilic cell adhesion via plasma membrane adhesion molecules* (3.52 fold enrichment,  $P = 4.40 \times 10^{-9}$ ,  $P_{\text{FDR}} = 6.86 \times 10^{-5}$ ), and
  - 1.3.2. *nervous system development* (1.40 fold enrichment,  $P = 3.93 \times 10^{-6}$ ,  $P_{\text{FDR}} = 2.04 \times 10^{-2}$ )

##### 2. Gene-based associations ( $p < 0.05$ ).

- 2.1. **Pathway analysis** identified two over-represented pathways in gene-based associations:
  - 2.1.1. *N/A*
- 2.2. **GO molecular function** terms under- and over-represented in the gene-based gene list set
  - 2.2.1. *antigen binding* (0.18 fold enrichment,  $P = 1.03 \times 10^{-6}$ ,  $P_{\text{FDR}} = 9.58 \times 10^{-4}$ ) and
  - 2.2.2. *protein binding* (1.11 fold enrichment,  $P = 7.07 \times 10^{-10}$ ,  $P_{\text{FDR}} = 8.24 \times 10^{-7}$ ).
- 2.3. **GO biological process** analyses also revealed a significant over-representation of genes involved in
  - 2.3.1. *anatomical structure development* (1.15 fold enrichment,  $P = 2.63 \times 10^{-5}$ ,  $P_{\text{FDR}} = 3.73 \times 10^{-2}$ )
    - 2.3.1.1.1. *developmental process* (1.15 fold enrichment,  $P = 3.18 \times 10^{-5}$ ,  $P_{\text{FDR}} = 3.81 \times 10^{-2}$ )
  - 2.3.2. *multicellular organismal process* (1.13 fold enrichment,  $P = 2.57 \times 10^{-5}$ ,  $P_{\text{FDR}} = 4.00 \times 10^{-2}$ )

- 2.3.3. *regulation of cellular process* (1.15 fold enrichment,  $P = 4.62 \times 10^{-6}$ ,  $P_{FDR} = 1.02 \times 10^{-2}$ )
- 2.3.4. *cellular process* (1.09 fold enrichment,  $P = 2.11 \times 10^{-12}$ ,  $P_{FDR} = 1.10 \times 10^{-8}$ )
- 2.3.5. *response to stimulus* (1.15 fold enrichment,  $P = 5.22 \times 10^{-6}$ ,  $P_{FDR} = 1.16 \times 10^{-2}$ )
- 2.3.6. *adaptive immune response* (0.49 fold enrichment,  $P = 2.90 \times 10^{-5}$ ,  $P_{FDR} = 3.77 \times 10^{-2}$ )

## 5 Supplementary Tables

**Supplementary Table S1.** Summary of study sample demographics and sampled geographic locations

|       | <b>Age</b> |            |            |             |           | n   | <b>Region (n)</b> |                |       |           |        |          |
|-------|------------|------------|------------|-------------|-----------|-----|-------------------|----------------|-------|-----------|--------|----------|
|       | <i>Min</i> | <i>Max</i> | <i>Med</i> | <i>Mean</i> | <i>SD</i> |     | Abha              | Khamis-Mushyat | Tabuk | Al-Jubail | Jeddah | Al-Hassa |
| Boys  | 8.23       | 13.93      | 11.63      | 11.63       | 1.31      | 273 | 40                | 22             | 34    | 52        | 69     | 56       |
| Girls | 8.31       | 13.70      | 10.70      | 10.88       | 1.43      | 81  | 0                 | 0              | 23    | 0         | 35     | 23       |
| Total | 8.23       | 13.93      | 11.42      | 11.33       | 1.36      | 354 | 40                | 22             | 57    | 52        | 104    | 70       |



**Supplementary Table S2.** Psychometric properties of Aurora-g subtests

| <b>Subtest</b> | <b><math>r_{xx}</math></b> | <b>% variance</b> | <b>K items</b> | <b>-LL</b> |
|----------------|----------------------------|-------------------|----------------|------------|
| VA             | 0.66                       | 15.3              | 17             | -78253     |
| VC             | 0.69                       | 13.2              | 18             | -78888     |
| VS             | 0.60                       | 12.2              | 19             | -84954     |
| NA             | 0.69                       | 18.3              | 17             | -67368     |
| NC             | 0.69                       | 6.6               | 18             | -73545     |
| NS             | 0.55                       | 11.4              | 16             | -58759     |
| FA             | 0.57                       | 18.7              | 9              | -37227     |
| FC             | 0.67                       | 25.9              | 10             | -37458     |
| FS             | 0.51                       | 18.6              | 8              | -32789     |

Note. VA: Verbal Analogies. VC: Verbal Classification, VS: Verbal Series, NA: Numerical Analogies, NC: Numerical Classification, NS: Numerical Series, FA: Figural Analogies, FC: Figural Classification, FS: Figural Series.  $r_{xx}$ : empirical estimate of subtest reliability (EAP factor scores), % variance: proportion of variance in item-level data explained by the 2PL model, K items: number of items retained for the subtest after local misfit analysis, -LL: log-likelihood function.

**Supplementary Table S3. Summary of fit of alternative latent variable / confirmatory factor analysis (CFA) models fit to Aurora data**

| <b>Model</b>             | <b>Corr</b> | <b>Y-B X<sup>2</sup></b> | <b>df</b> | <b><i>p</i></b>    | <b>CFI</b>   | <b>RMSEA</b> | <b>(95% CI)</b>        |
|--------------------------|-------------|--------------------------|-----------|--------------------|--------------|--------------|------------------------|
| Domain                   | Yes         | 157.257                  | 24        | <0.00001           | 0.976        | 0.029        | (0.025 – 0.033)        |
| Type                     | Yes         | 335.294                  | 24        | <0.00001           | 0.939        | 0.045        | (0.042 – 0.050)        |
| Domain+Type              | No          | 929.061                  | 18        | <0.00001           | 0.677        | 0.123        | (0.118 – 0.127)        |
| Domain+Type              | Yes         | 36.392                   | 15        | 0.00155            | 0.996        | 0.014        | (0.009 – 0.020)        |
| 2 <sup>nd</sup> -order g | No          | 157.257                  | 24        | <0.00001           | 0.976        | 0.029        | (0.025 – 0.033)        |
| <b>Bifactor*</b>         | <b>No</b>   | <b>126.415</b>           | <b>18</b> | <b>&lt;0.00001</b> | <b>0.979</b> | <b>0.031</b> | <b>(0.026 – 0.036)</b> |
| Reduced bifactor         | No          | 157.529                  | 21        | <0.00001           | 0.975        | 0.032        | (0.027 – 0.036)        |

Note. Corr: inclusion of estimated factor covariances. Y-B X<sup>2</sup>: Yuan and Bentler's residual-based test statistic. CFI: Comparative Fit Index, RMSEA: Root Mean Square Error of Approximation. \*: final model selected for the estimation of factor scores.

**Supplementary Table S4.** Description of ROH and CNV calls in the study sample

|             | <b>Segments (per person)</b> |            |            | <b>Cumulative length (per person)</b> |            |             |             |               |            |
|-------------|------------------------------|------------|------------|---------------------------------------|------------|-------------|-------------|---------------|------------|
|             |                              | <i>Min</i> | <i>Max</i> | <i>Media</i><br><i>n</i>              | <i>Min</i> | <i>Max</i>  | <i>Mean</i> | <i>Median</i> | <i>SD</i>  |
| <b>ROHs</b> | A                            | 19         | 103        | 55                                    | 9,401,361  | 70,610,088  | 34,837,392  | 34,709,328    | 11,761,327 |
| Prior to    | B                            | 0          | 41         | 8                                     | 0          | 91,889,339  | 21,693,414  | 18,251,557    | 16,318,024 |
| CNV         | C                            | 0          | 33         | 2                                     | 0          | 533,575,331 | 61,849,913  | 18,030,970    | 84,960,332 |
| exclusion   | A+B+C                        | 19         | 141        | 71                                    | 9,640,918  | 643,487,310 | 118,380,719 | 7,741,540     | 98,738,348 |
| <b>ROHs</b> | A                            | 14         | 84         | 41                                    | 6,747,526  | 53,417,618  | 25,478,418  | 25,128,933    | 8,726,857  |
| Post        | B                            | 0          | 21         | 4                                     | 0          | 42,254,342  | 9,595,242   | 7,813,738     | 7,766,295  |
| CNV         | C                            | 0          | 4          | 0                                     | 0          | 42,725,385  | 3,141,082   | 0             | 6,145,696  |
| exclusion   | A+B+C                        | 14         | 95         | 46                                    | 6,747,526  | 90,624,411  | 38,214,742  | 35,890,473    | 16,736,061 |
| <b>CNVs</b> | Gains                        | 0          | 38         | 1                                     | 0          | 19,331,378  | 337,885     | 144,480       | 1,081,031  |
|             | Losses                       | 0          | 62         | 1                                     | 0          | 11,366,652  | 468,561     | 119,794       | 1,070,476  |
|             | Gain+Losses                  | 0          | 63         | 2                                     | 0          | 19,384,334  | 806,446     | 360,001       | 1,505,694  |

Supplementary Table S5. Nominally significant ( $P < 0.05$ ) genic sCNV associations with Aurora

| sCNV      | <i>B</i> | <i>SE</i> | <i>T</i> | <i>P</i>    | Chr   | Start       | End         | Length  | FREQ   | Gene                                                        | Pheno  |
|-----------|----------|-----------|----------|-------------|-------|-------------|-------------|---------|--------|-------------------------------------------------------------|--------|
| sLOSS_79  | 16.28    | 6.12      | 2.66     | 0.008405509 | chr10 | 47,543,322  | 47,646,751  | 103,430 | 0.0170 | <i>PTPN20, GLUD1P2</i>                                      | Aurora |
| sGAIN_152 | 19.47    | 7.47      | 2.61     | 0.009748708 | chr7  | 157,791,030 | 157,803,711 | 12,682  | 0.0113 | <i>PTPRN2</i>                                               | Aurora |
| sGAIN_36  | 10.66    | 4.23      | 2.52     | 0.012433463 | chr16 | 818,802     | 820,215     | 1,414   | 0.0368 | <i>MSLN, MIR662</i>                                         | Aurora |
| sGAIN_35  | 11.37    | 4.58      | 2.48     | 0.013800989 | chr16 | 802,234     | 818,801     | 16,568  | 0.0312 | <i>MSLN</i>                                                 | Aurora |
| sGAIN_39  | 12.34    | 5.05      | 2.45     | 0.015191494 | chr16 | 831,497     | 840,769     | 9,273   | 0.0255 | <i>RPUSD1, CHTF18</i>                                       | Aurora |
| sLOSS_79  | 14.46    | 6.14      | 2.35     | 0.019430603 | chr10 | 47,543,322  | 47,646,751  | 103,430 | 0.0170 | <i>PTPN20, GLUD1P2</i>                                      | Aurora |
| sGAIN_48  | 14.28    | 6.15      | 2.32     | 0.021019379 | chr10 | 15,045,635  | 15,057,374  | 11,740  | 0.0170 | <i>ACBD7, DCLRE1C</i>                                       | Aurora |
| sLOSS_15  | 16.98    | 7.50      | 2.26     | 0.024459566 | chr21 | 47,821,589  | 47,848,458  | 26,870  | 0.0113 | <i>PCNT</i>                                                 | Aurora |
| sLOSS_747 | 16.97    | 7.50      | 2.26     | 0.024557634 | chr6  | 135,842,804 | 135,983,115 | 140,312 | 0.0113 | <i>LINC00271</i>                                            | Aurora |
| sGAIN_34  | 10.76    | 4.81      | 2.24     | 0.026104405 | chr16 | 778,597     | 802,233     | 23,637  | 0.0283 | <i>NARFL, HAGHL</i>                                         | Aurora |
| sGAIN_46  | 12.72    | 5.71      | 2.23     | 0.026772963 | chr10 | 14,996,416  | 15,027,213  | 30,798  | 0.0198 | <i>DCLRE1C, MEIG1</i>                                       | Aurora |
| sGAIN_52  | 9.78     | 4.41      | 2.22     | 0.027488757 | chr10 | 135,284,115 | 135,343,737 | 59,623  | 0.0340 | <i>CYP2E1, SCART1</i>                                       | Aurora |
| sGAIN_33  | 11.13    | 5.06      | 2.20     | 0.028768331 | chr16 | 772,842     | 778,596     | 5,755   | 0.0255 | <i>CCDC78, HAGHL</i><br><i>MIR937, PUF60, SCRIB, NRBP2,</i> | Aurora |
| sLOSS_279 | 16.17    | 7.51      | 2.15     | 0.032250953 | chr8  | 144,886,809 | 144,940,778 | 53,970  | 0.0113 | <i>EPPK1</i>                                                | Aurora |
| sLOSS_210 | 13.07    | 6.16      | 2.12     | 0.034882803 | chr14 | 105,163,532 | 105,189,504 | 25,973  | 0.0170 | <i>INF2</i>                                                 | Aurora |
| sLOSS_429 | 12.93    | 6.16      | 2.10     | 0.036886455 | chr10 | 27,624,562  | 27,703,017  | 78,456  | 0.0170 | <i>PTCHD3</i>                                               | Aurora |
| sGAIN_111 | 13.98    | 6.73      | 2.08     | 0.038905817 | chr7  | 157,734,314 | 157,791,029 | 56,716  | 0.0142 | <i>PTPRN2</i>                                               | Aurora |
| sLOSS_747 | 15.50    | 7.51      | 2.06     | 0.04016544  | chr6  | 135,842,804 | 135,983,115 | 140,312 | 0.0113 | <i>LINC00271</i>                                            | Aurora |
| sGAIN_39  | 10.32    | 5.06      | 2.04     | 0.042757981 | chr16 | 831,497     | 840,769     | 9,273   | 0.0255 | <i>RPUSD1, CHTF18</i>                                       | Aurora |
| sGAIN_40  | 10.91    | 5.36      | 2.04     | 0.042869387 | chr16 | 840,770     | 855,732     | 14,963  | 0.0227 | <i>PRR25, GNG13, CHTF18</i>                                 | Aurora |
| sGAIN_152 | 15.07    | 7.52      | 2.00     | 0.046146435 | chr7  | 157,791,030 | 157,803,711 | 12,682  | 0.0113 | <i>PTPRN2</i>                                               | Aurora |
| sLOSS_16  | 13.40    | 6.74      | 1.99     | 0.047821795 | chr21 | 47,848,459  | 47,856,909  | 8,451   | 0.0142 | <i>PCNT</i>                                                 | Aurora |

**Supplementary Table S6.** Linear regression parameter estimates for Class 1 (with permutation P-values)

| <b>Parameter</b> | <b>B</b> | <b>P</b> |
|------------------|----------|----------|
| PC1              | 11.91    | 0.8431   |
| PC2              | -30.48   | 0.6667   |
| PC3              | 49.67    | 0.9020   |
| PC4              | -34.91   | 0.8627   |
| PC5              | 14.32    | 0.7451   |
| fROH(A)          | 3.77     | 0.7647   |
| fROH(B)          | 7.23     | 0.1600   |
| fROH(C)          | -2.21    | 0.0185   |
| CNV burden       | -49.57   | 0.0018   |

**Supplementary Table S7.** Quantile regression parameter estimates for latent class 3 (Aurora-G is the dependent variable)

| <b>Quantile</b> | <b>Coefficient</b> | <b>B</b>  | <b>SE</b> | <b>T</b> | <b>P</b>    |
|-----------------|--------------------|-----------|-----------|----------|-------------|
| 25              | Intercept          | 103.06    | 9.64      | 10.69    | 0           |
|                 | PC1                | 91.16     | 70.84     | 1.29     | 0.200230159 |
|                 | PC2                | -33.70    | 75.81     | -0.44    | 0.657374663 |
|                 | PC3                | 30.25     | 338.94    | 0.09     | 0.929007806 |
|                 | PC4                | -12.13    | 47.10     | -0.26    | 0.797131533 |
|                 | PC5                | -31.86    | 102.00    | -0.31    | 0.755217515 |
|                 | fROH(A)            | -4.46     | 8.73      | -0.51    | 0.610214211 |
|                 | fROH(B)            | -3.29     | 9.51      | -0.35    | 0.730229045 |
|                 | fROH©              | -5.98     | 12.05     | -0.50    | 0.620272590 |
|                 | CNV burden         | 139.26    | 138.09    | 1.01     | 0.314930608 |
|                 | 50                 | Intercept | 110.20    | 7.82     | 14.10       |
| PC1             |                    | 81.22     | 65.86     | 1.23     | 0.219524329 |
| PC2             |                    | -72.16    | 64.83     | -1.11    | 0.267569514 |
| PC3             |                    | 114.77    | 301.40    | 0.38     | 0.703920201 |
| PC4             |                    | 34.86     | 38.98     | 0.89     | 0.372778165 |
| PC5             |                    | -2.30     | 89.14     | -0.03    | 0.979433912 |
| fROH(A)         |                    | 5.31      | 7.93      | 0.67     | 0.503766932 |
| fROH(B)         |                    | -15.94    | 9.27      | -1.72    | 0.087888655 |
| fROH©           |                    | -1.93     | 10.87     | -0.18    | 0.859205711 |
| CNV burden      |                    | 17.97     | 118.61    | 0.15     | 0.879788332 |
| 75              |                    | Intercept | 115.02    | 8.50     | 13.53       |
|                 | PC1                | -6.53     | 61.27     | -0.11    | 0.915232854 |
|                 | PC2                | -66.23    | 46.82     | -1.41    | 0.159351919 |
|                 | PC3                | 205.05    | 257.82    | 0.80     | 0.427756194 |
|                 | PC4                | 83.50     | 37.01     | 2.26     | 0.025606803 |
|                 | PC5                | 64.17     | 92.88     | 0.69     | 0.490770728 |
|                 | fROH(A)            | 4.51      | 7.91      | 0.57     | 0.569429334 |
|                 | fROH(B)            | -7.37     | 9.30      | -0.79    | 0.429569802 |
|                 | fROH©              | 0.62      | 11.88     | 0.05     | 0.958679955 |
|                 | CNV burden         | 82.71     | 125.97    | 0.66     | 0.512532206 |

**Supplementary Table S8.** Quantile regression parameter estimates for latent Classes 4 and 5 (Aurora-G is the dependent variable).

| <b>Quantile</b> | <b>Coefficient</b> | <b>B</b> | <b>SE</b> | <b>T</b> | <b>P</b>    |
|-----------------|--------------------|----------|-----------|----------|-------------|
| 25              | Intercept          | 110.21   | 11.07     | 9.95     | 0           |
|                 | PC1                | 59.60    | 78.35     | 0.76     | 0.448251967 |
|                 | PC2                | -16.53   | 56.46     | -0.29    | 0.770158305 |
|                 | PC3                | 48.12    | 26.06     | 1.85     | 0.067203327 |
|                 | PC4                | 16.54    | 19.63     | 0.84     | 0.401085854 |
|                 | PC5                | -9.35    | 31.44     | -0.30    | 0.766733170 |
|                 | fROH(A)            | -5.87    | 7.66      | -0.77    | 0.445157693 |
|                 | fROH(B)            | 5.69     | 3.81      | 1.49     | 0.138058727 |
|                 | fROH©              | -1.28    | 0.60      | -2.11    | 0.036638475 |
|                 | CNV                |          |           |          |             |
|                 | burden             | -63.37   | 114.88    | -0.55    | 0.582200088 |
| 50              | Intercept          | 106.11   | 6.43      | 16.51    | 0           |
|                 | PC1                | -33.96   | 49.83     | -0.68    | 0.496744476 |
|                 | PC2                | 13.66    | 37.38     | 0.37     | 0.715399248 |
|                 | PC3                | 69.03    | 50.87     | 1.36     | 0.177141915 |
|                 | PC4                | 2.85     | 18.62     | 0.15     | 0.878651807 |
|                 | PC5                | -16.30   | 26.18     | -0.62    | 0.534598745 |
|                 | fROH(A)            | 3.18     | 4.59      | 0.69     | 0.490139916 |
|                 | fROH(B)            | 3.70     | 2.59      | 1.43     | 0.155695074 |
|                 | fROH©              | -0.14    | 0.42      | -0.32    | 0.749585604 |
|                 | CNV                |          |           |          |             |
|                 | burden             | -107.91  | 75.10     | -1.44    | 0.153217076 |
| 75              | Intercept          | 125.16   | 5.97      | 20.95    | 0           |
|                 | PC1                | 21.88    | 52.76     | 0.41     | 0.679094491 |
|                 | PC2                | -6.61    | 46.38     | -0.14    | 0.886908100 |
|                 | PC3                | 1.47     | 29.51     | 0.05     | 0.960343589 |
|                 | PC4                | 16.87    | 21.05     | 0.80     | 0.424322840 |
|                 | PC5                | -20.54   | 33.17     | -0.62    | 0.536781722 |
|                 | fROH(A)            | -2.40    | 3.81      | -0.63    | 0.529722948 |
|                 | fROH(B)            | 1.44     | 2.63      | 0.55     | 0.584233969 |
|                 | fROH©              | -0.23    | 0.50      | -0.45    | 0.653609625 |
|                 | CNV                |          |           |          |             |
|                 | burden             | -214.63  | 74.96     | -2.86    | 0.004906770 |

## 6 Supplementary Figures

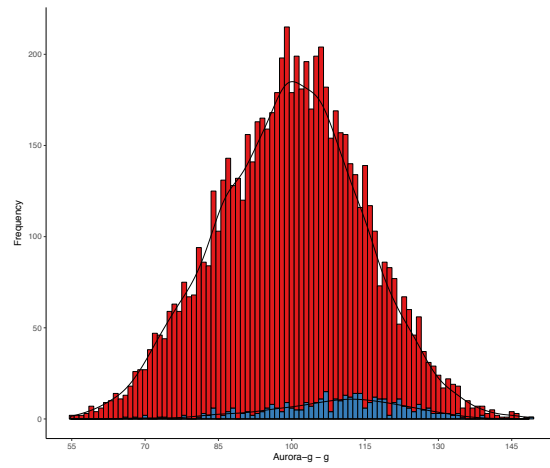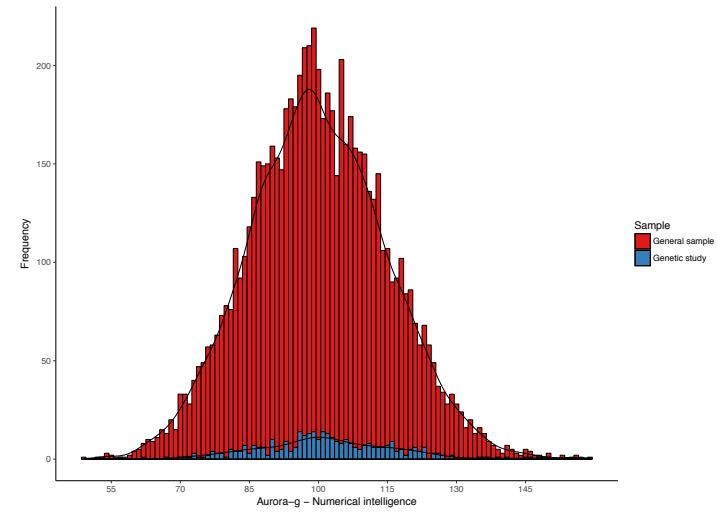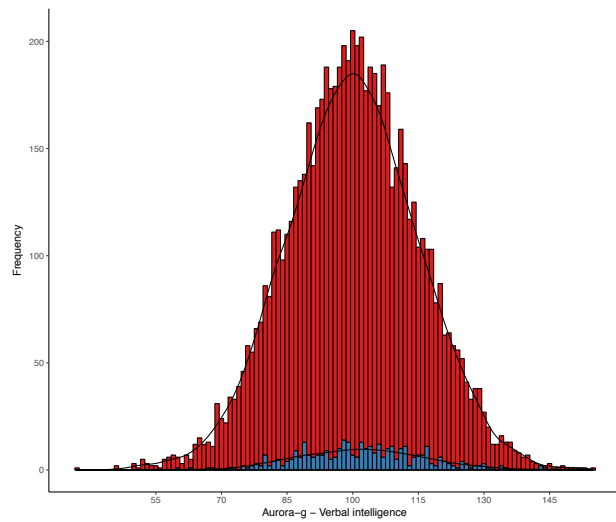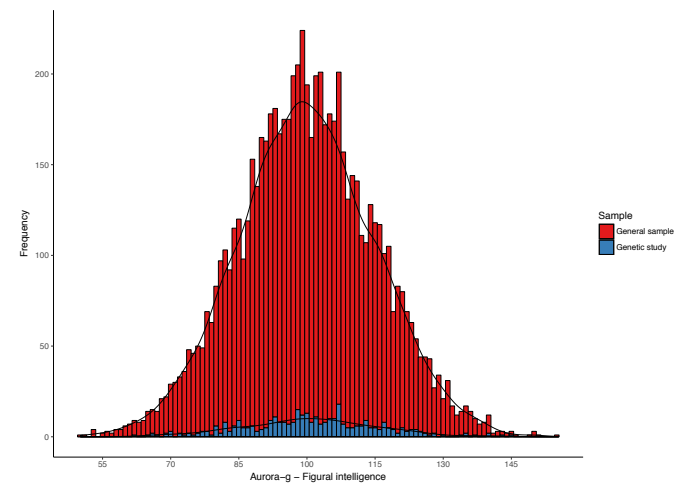

**Supplementary Figure S1.** Distribution of latent general cognitive ability scores in the study sample and the general population of children in Saudi Arabia



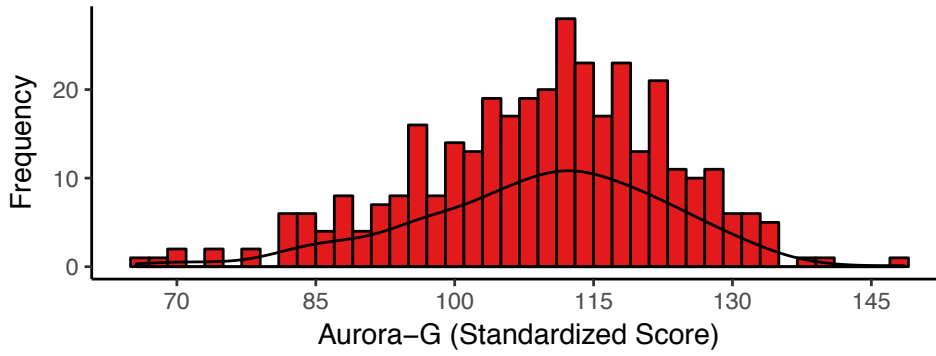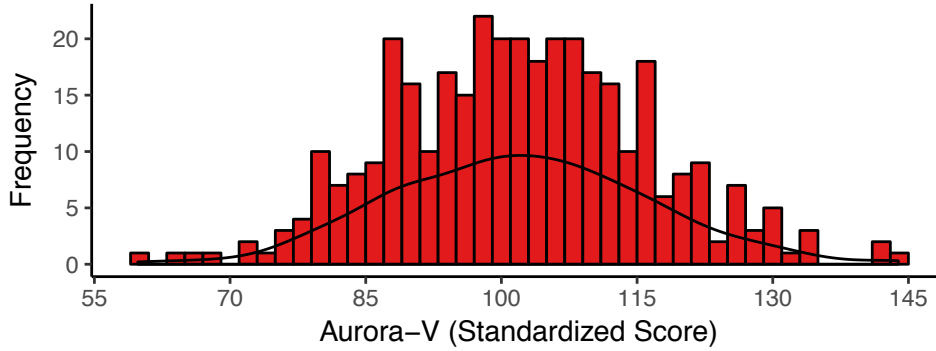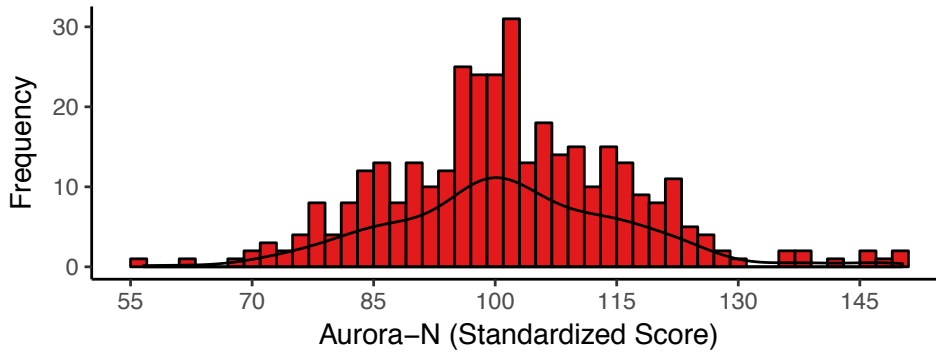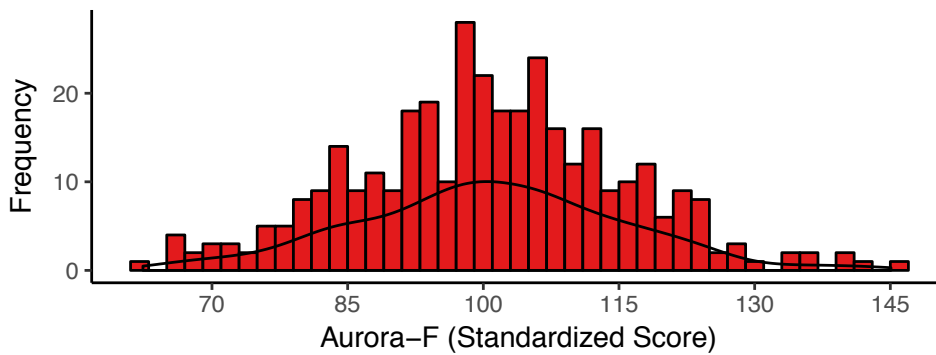

**Supplementary Figure S2. Sample distributions of latent general cognitive ability estimates from Aurora.** Aurora-V – verbal cognitive ability, Aurora-F: numerical cognitive ability, Aurora-S: spatial cognitive ability; Aurora-G: general cognitive ability.

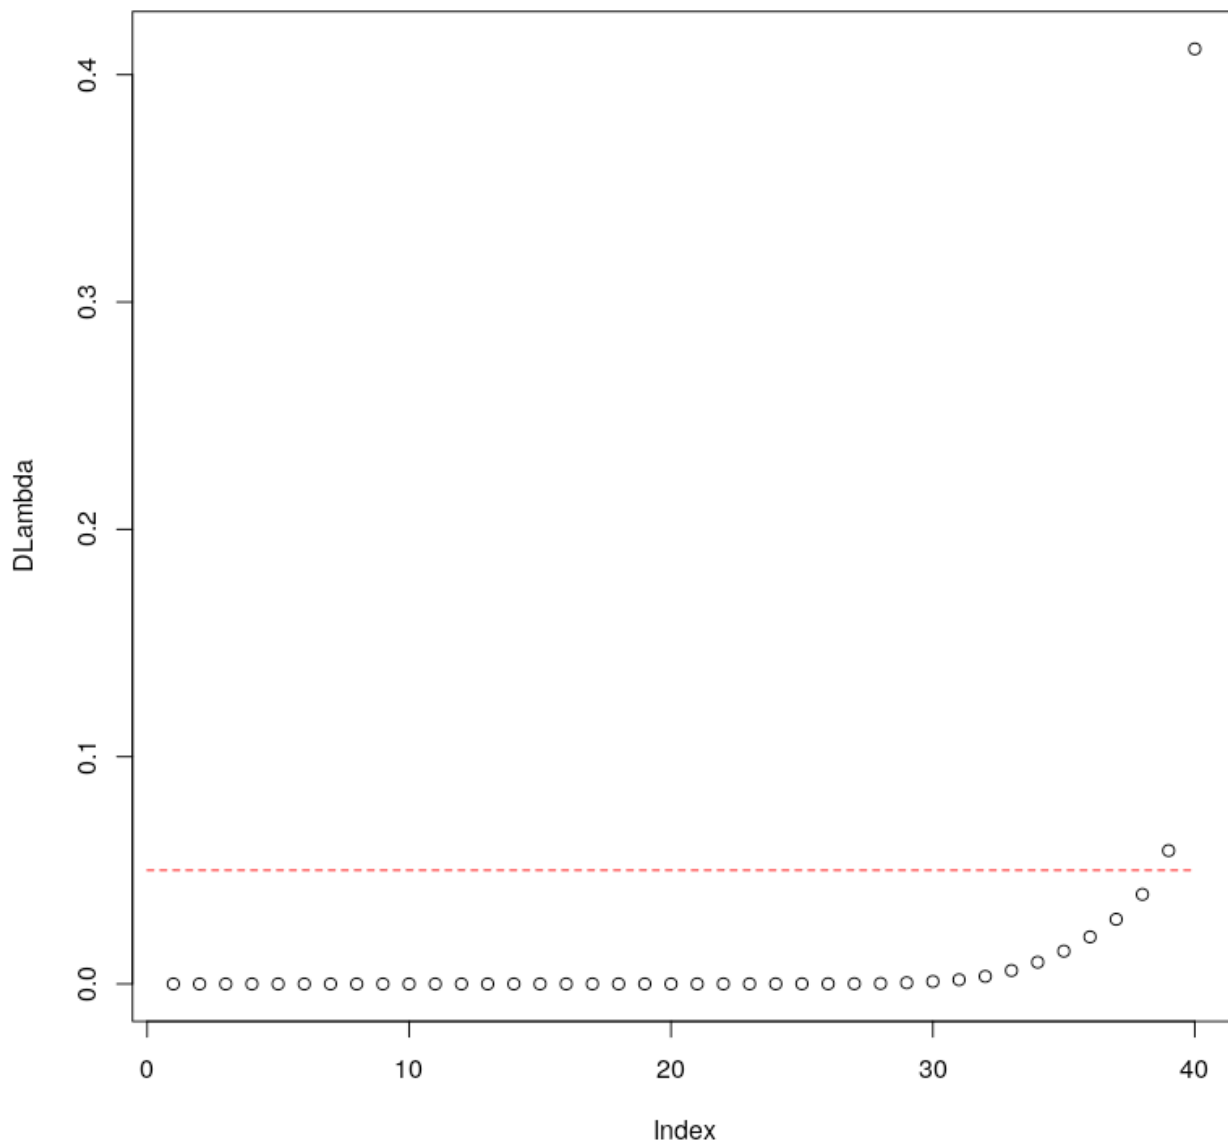

**Supplementary Figure S3.** Stability approach to regularization selection (StARS) tuning parameter values for CONE-based evaluation of ancestry. Red dotted line represents the default threshold parameter  $\beta$ .

**A**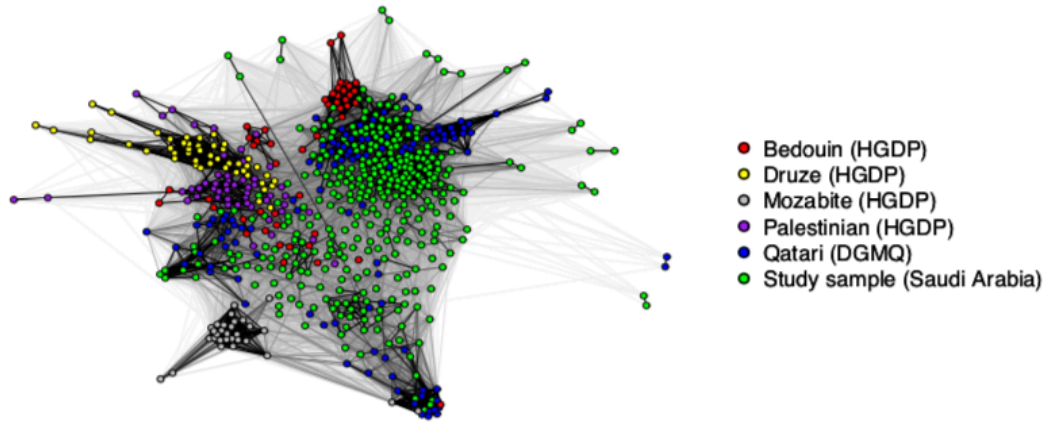**B**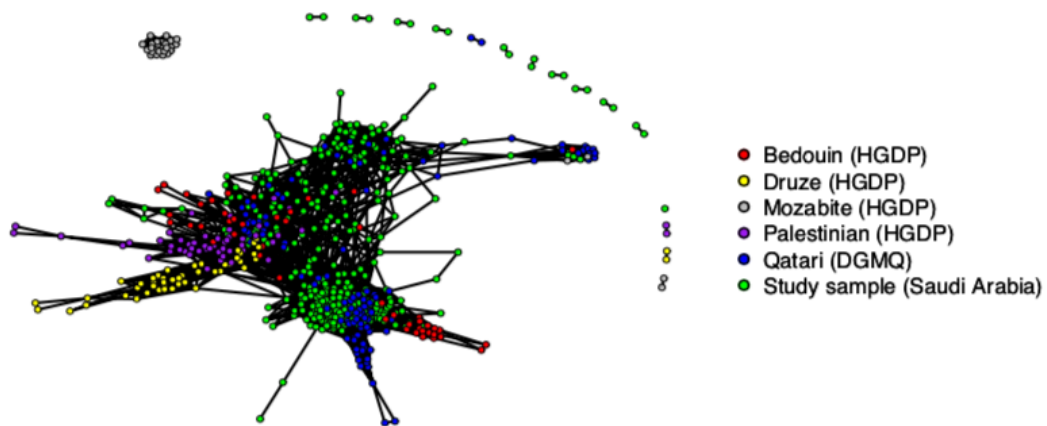**C**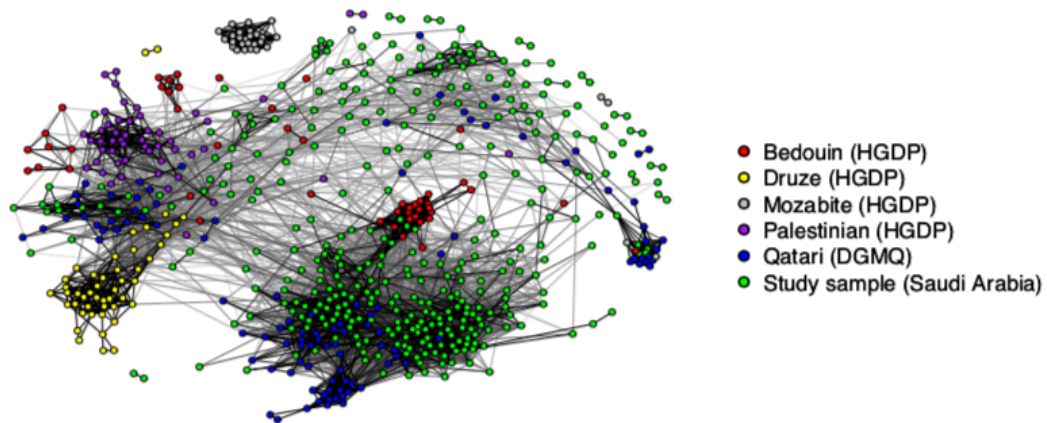

**Supplementary Figure S4.** Dependency graph estimated for the study sample data as well as the Middle Eastern population from HGDP and DGMQ datasets. A – StARS-based graph; B – customized neighborhood selection graph; C – combined graph.

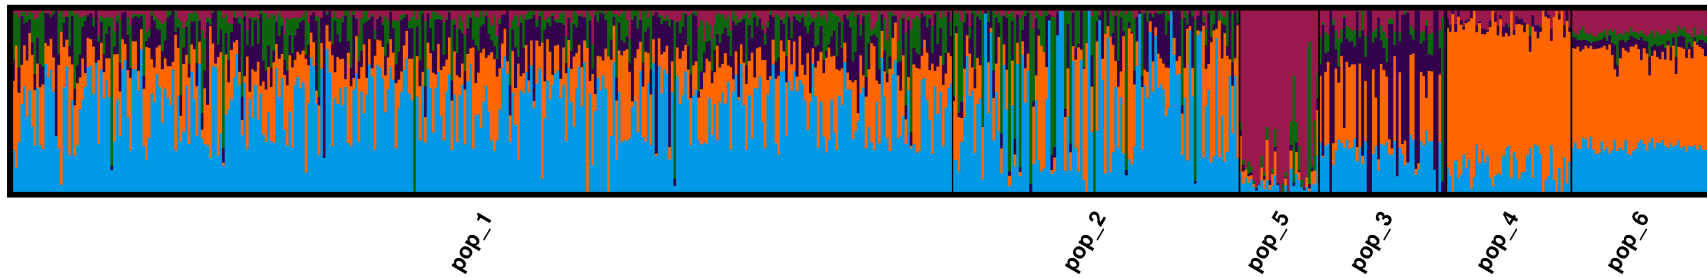

**Supplementary Figure S5.** Population structure graph based on ADMIXTURE analysis (for  $k=5$  ancestral populations). Pop\_1 – study sample (Saudi Arabia), pop\_2 – DGMQ (Qatar) sample, pop\_3 – Bedouin (HGDP), pop\_4 – Druze (HGDP), pop\_5 – Mozabite (HGDP), pop\_6 – Palestinian (HGDP).

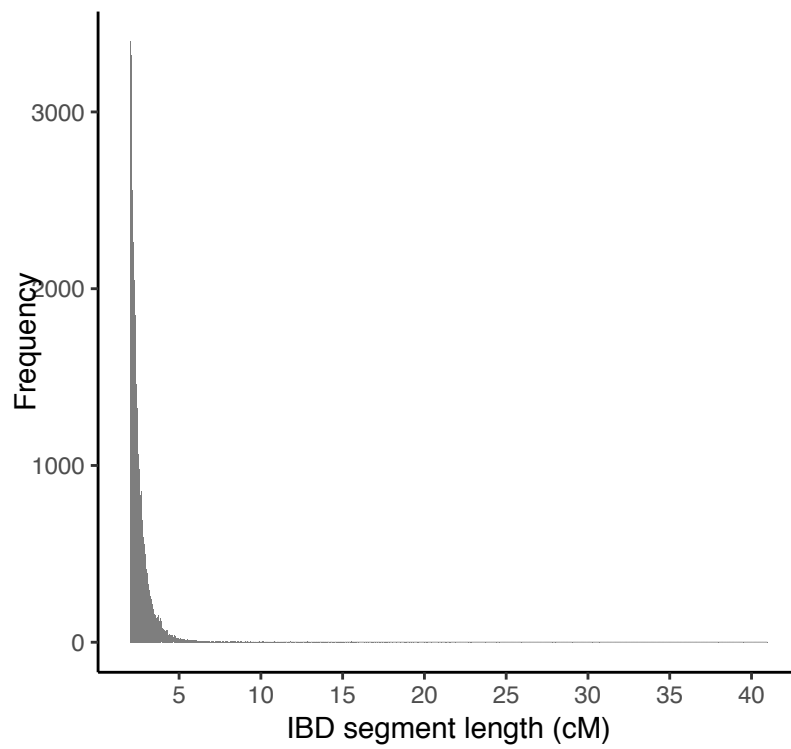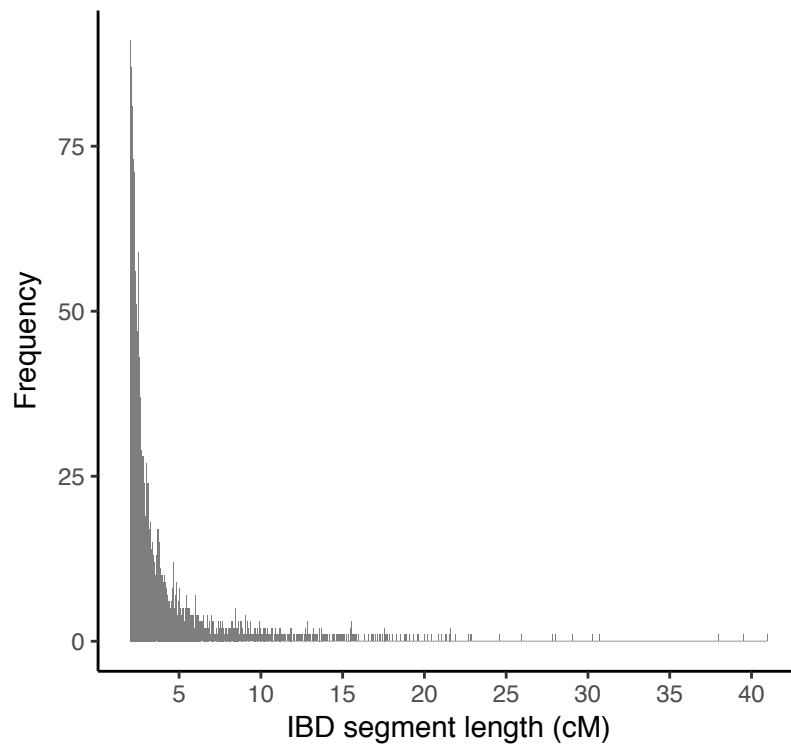

**Supplementary Figure S6.** IBD segment length distributions in the total sample (top panel) vs related individuals (bottom panel; up to 7<sup>th</sup> degree).

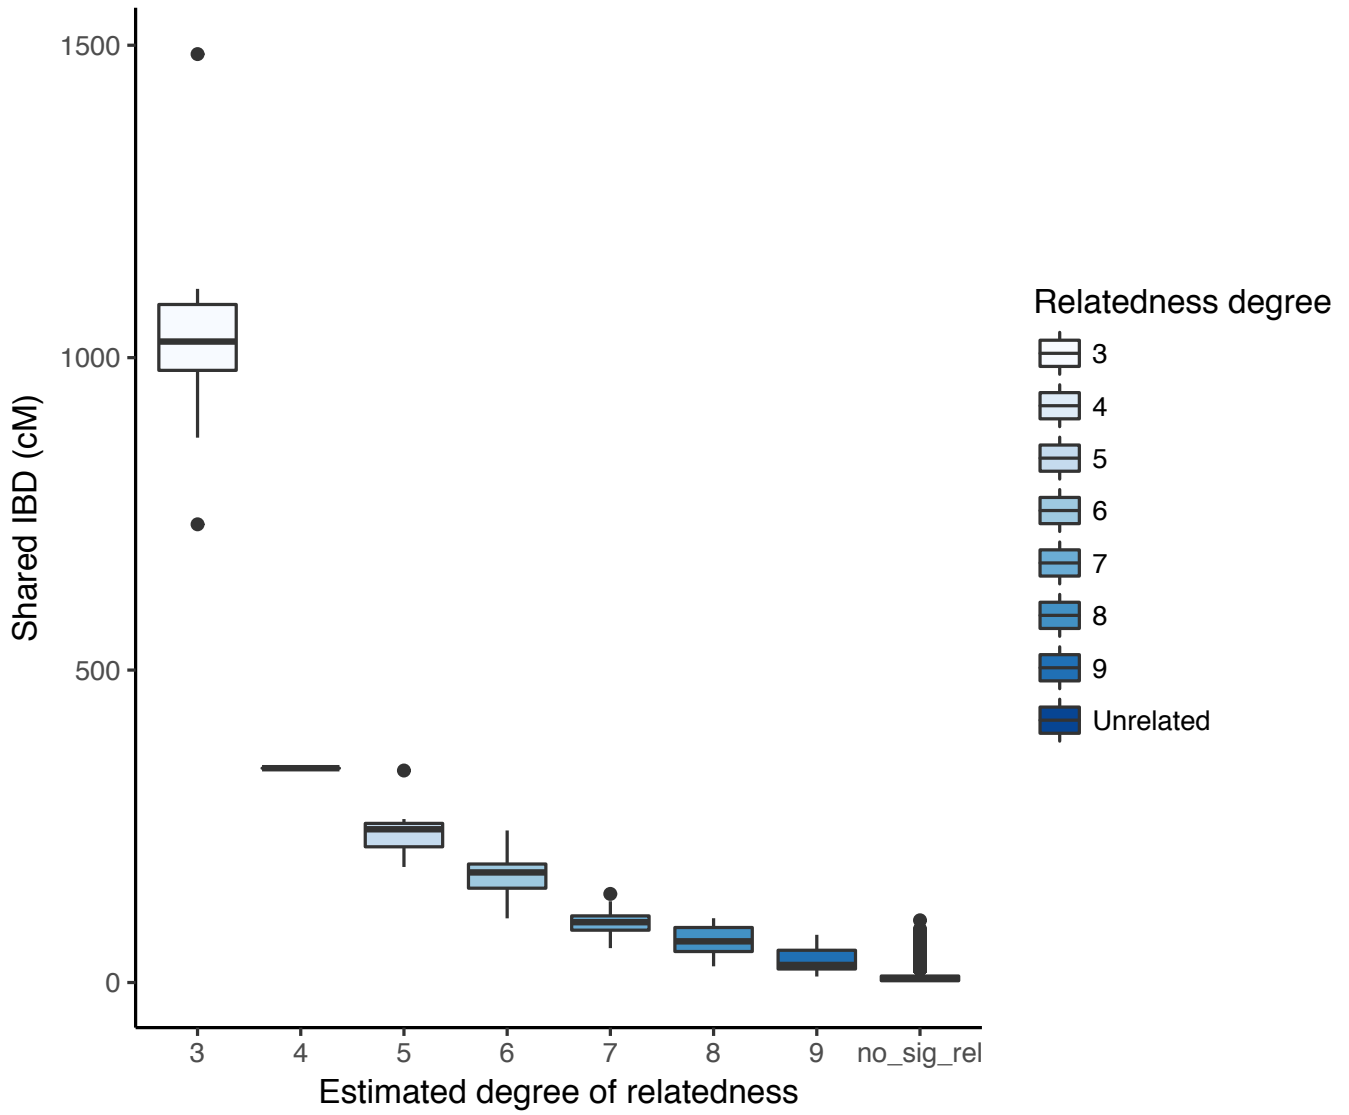

**Supplementary Figure S7.** Boxplots of cumulative IBD sharing among pairs of individuals of different degrees of relatedness as estimated by ERSA and FISHR2.

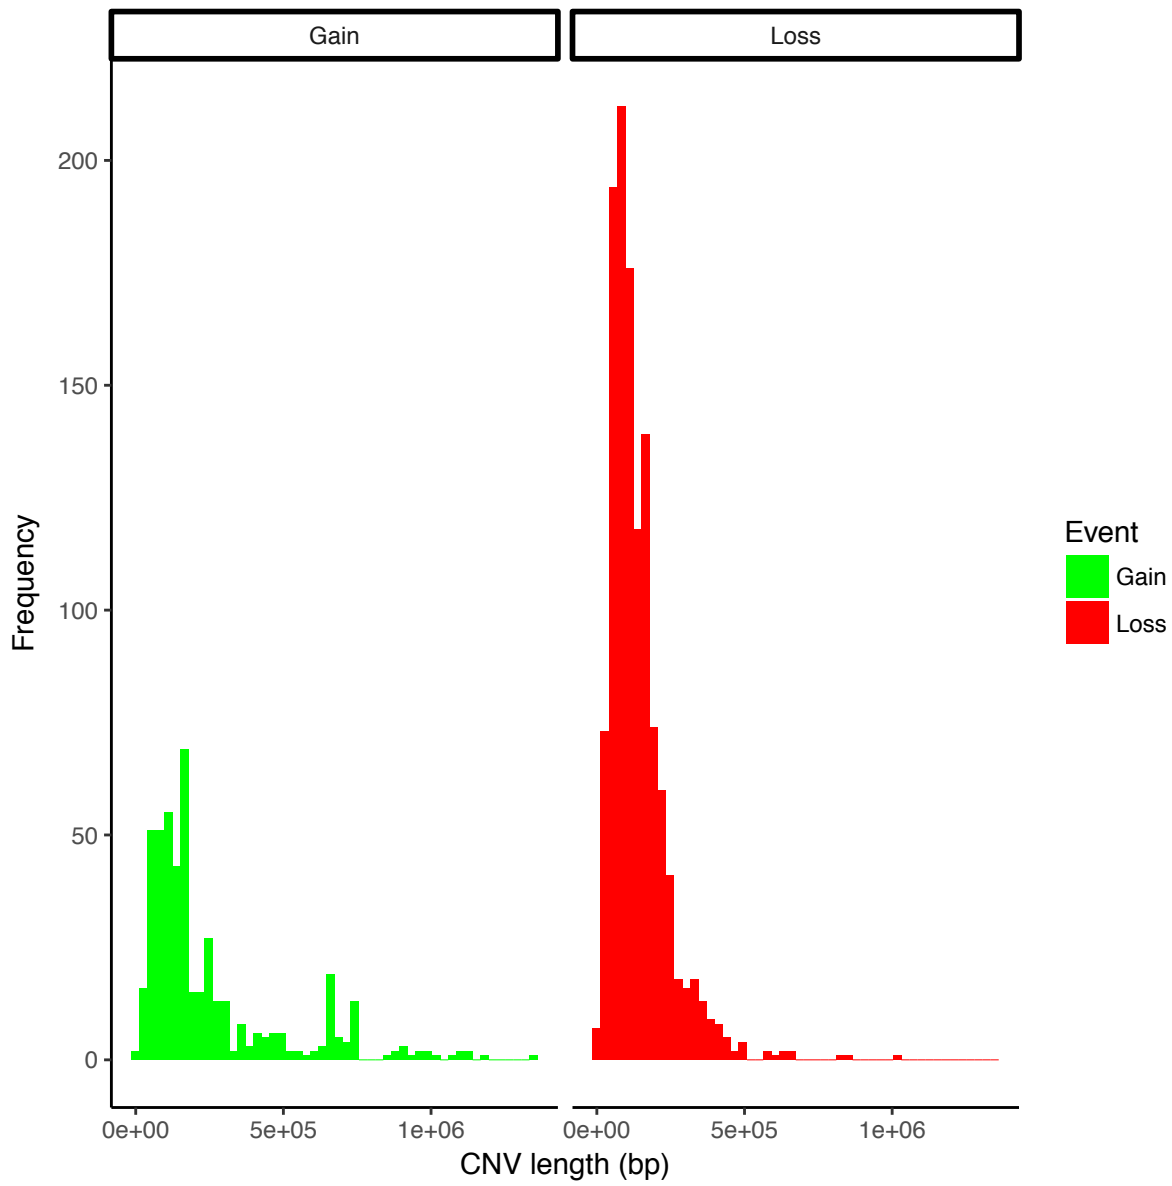

**Supplementary Figure S8.** CNV segment length distributions in the study sample (n=353)

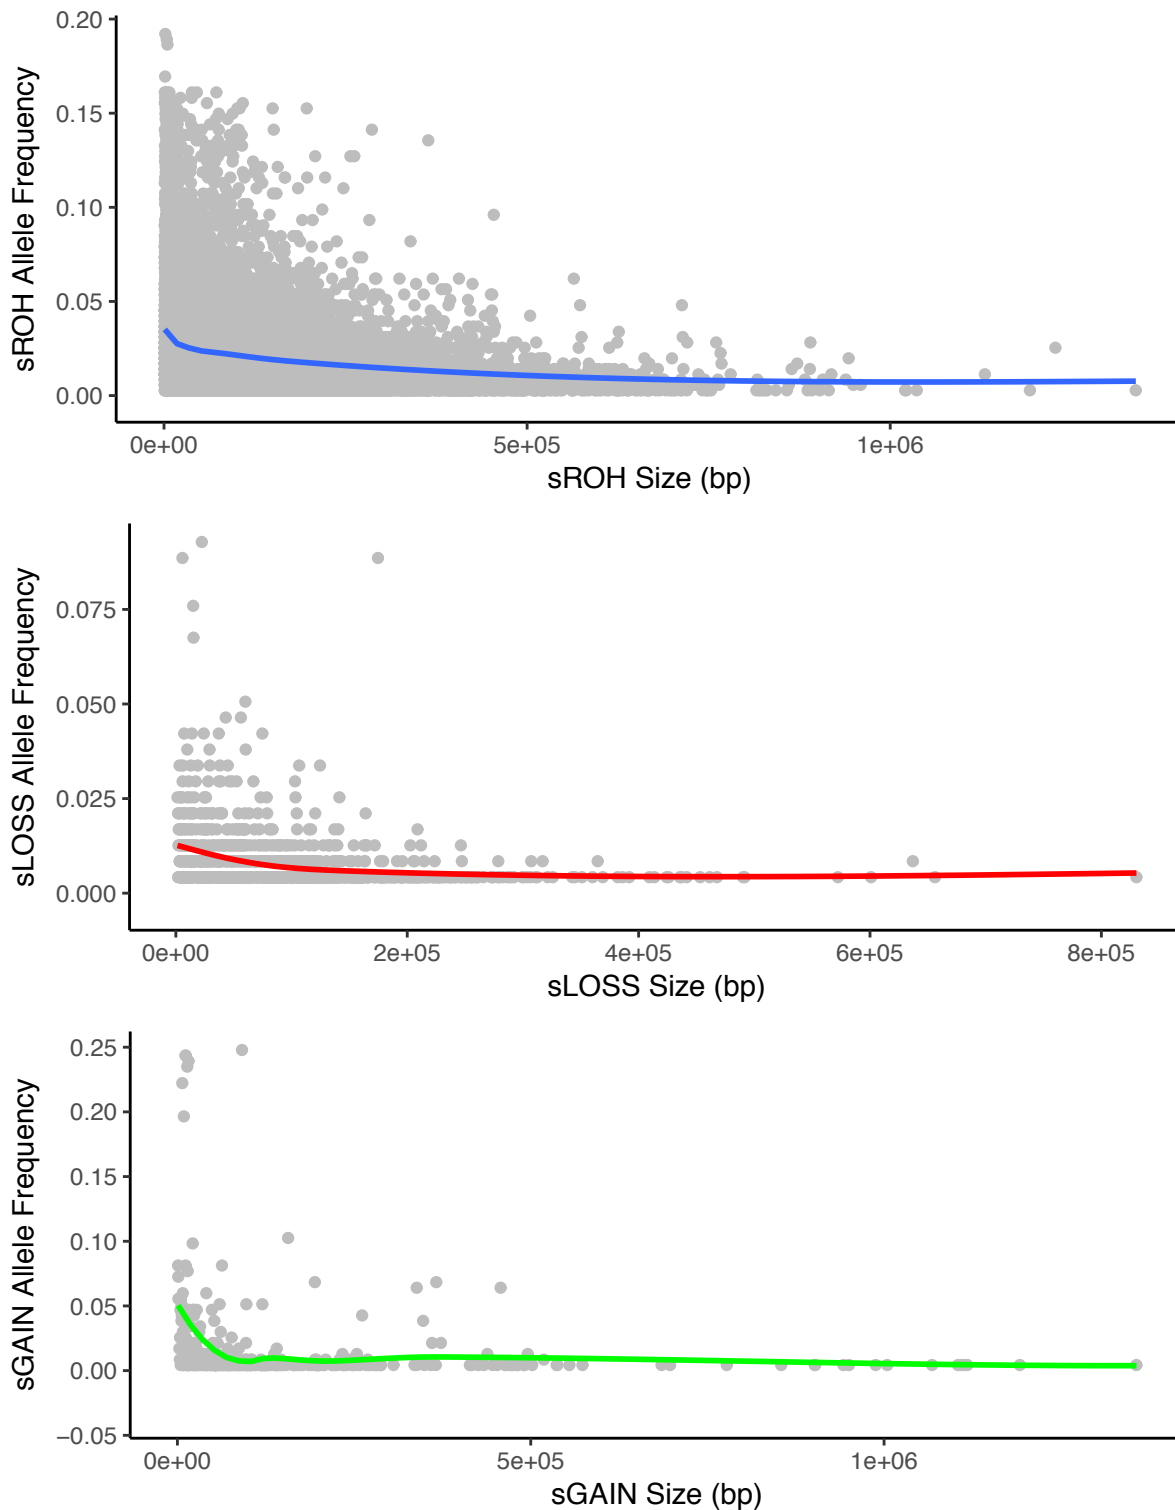

**Supplementary Figure S9.** Scatterplots of sROH and sCNV (sLOSS+sGAIN) allele frequencies vs. sROH and sCNV segment length



**Q-Q plot for Aurora-G (sLOSS)**

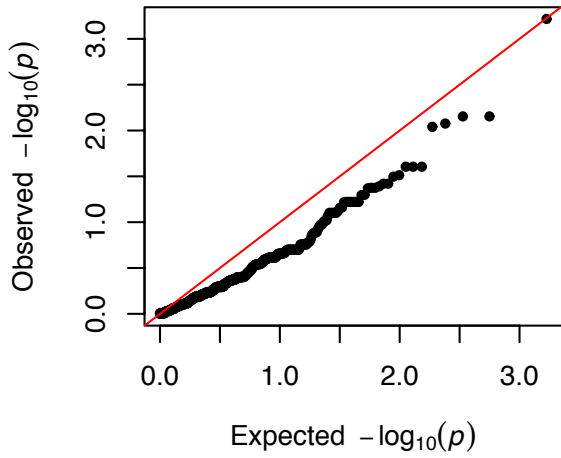

**Q-Q plot for Aurora-V (sLOSS)**

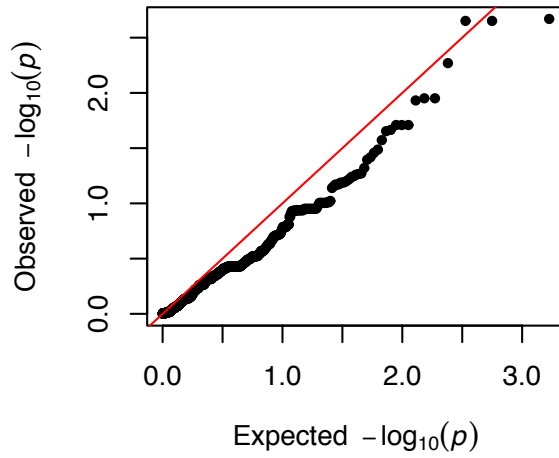

**Q-Q plot for Aurora-N (sLOSS)**

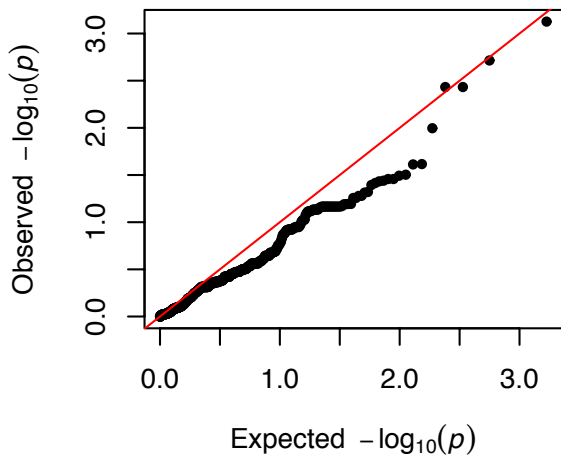

**Q-Q plot for Aurora-F (sLOSS)**

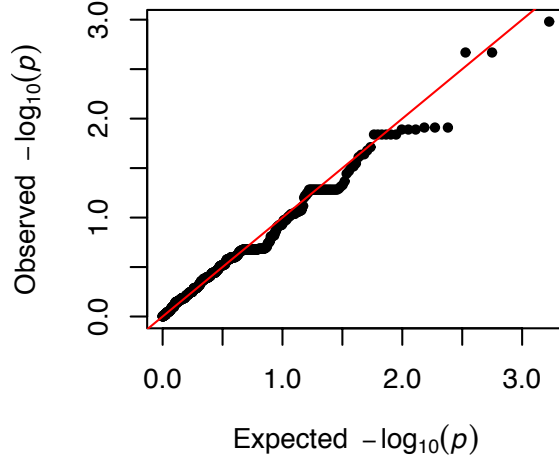

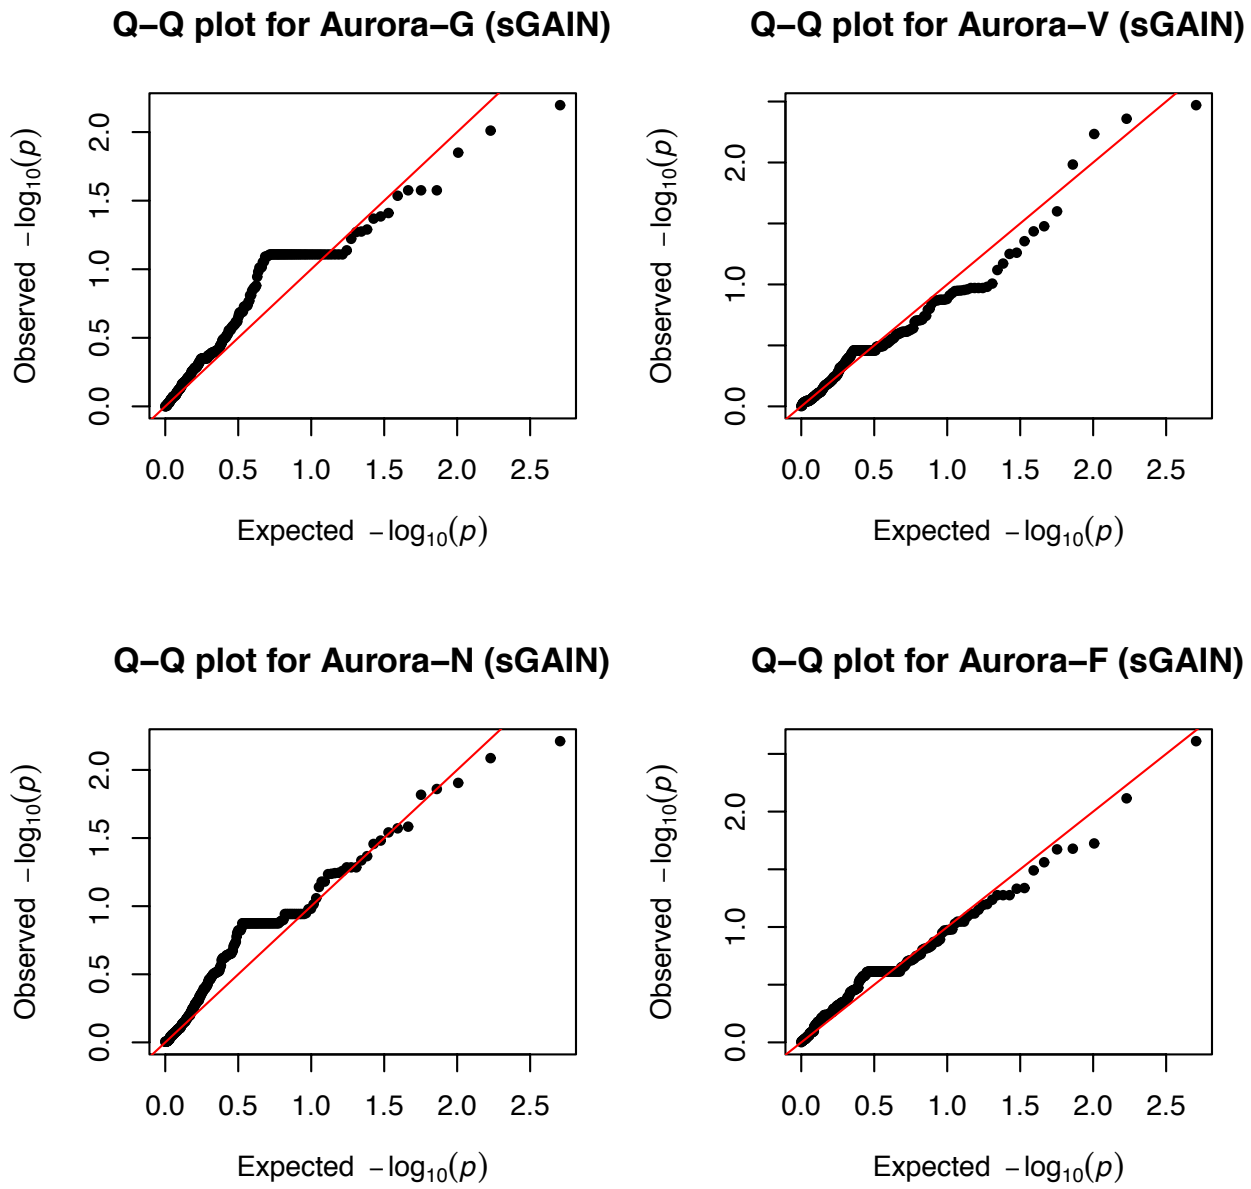

**Supplementary Figure S10.** Q-Q plots for sCNV-based association analysis of Aurora-g

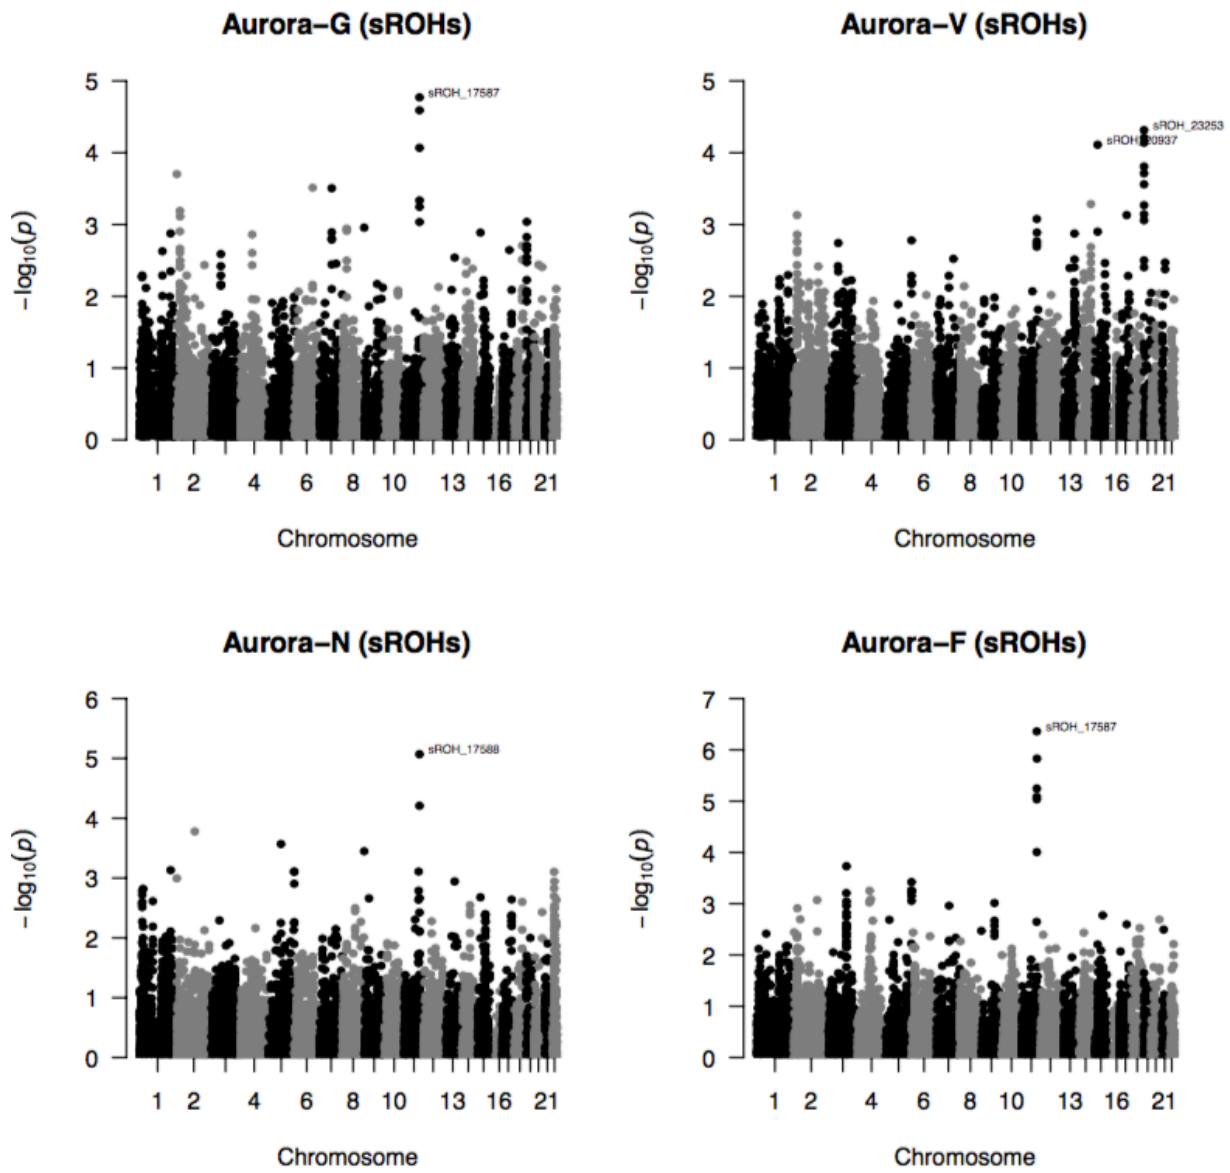

**Supplementary Figure S11.** Manhattan plots for sROH-based association analysis of Aurora

**Aurora-G (sLOSS)**

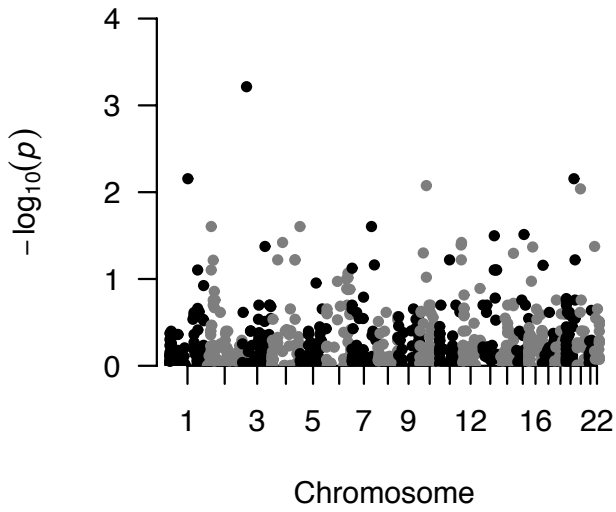

**Aurora-V (sLOSS)**

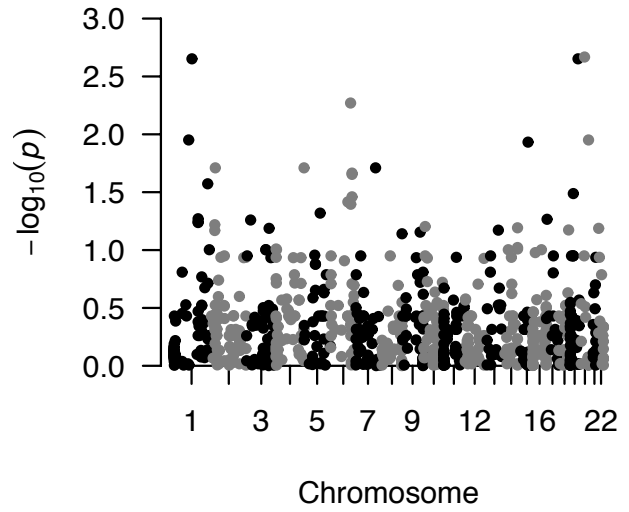

**Aurora-N (sLOSS)**

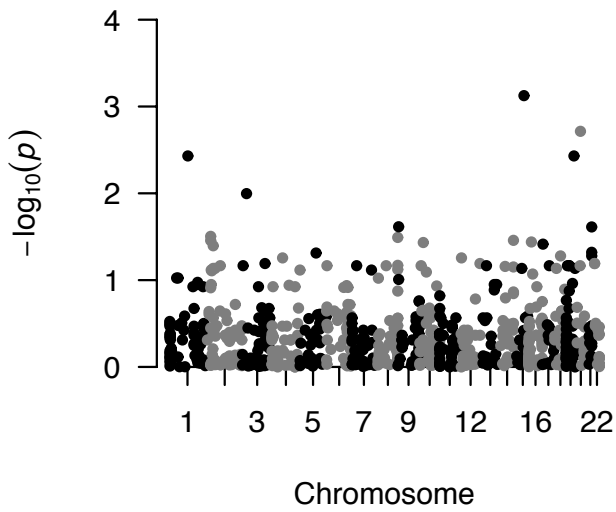

**Aurora-F (sLOSS)**

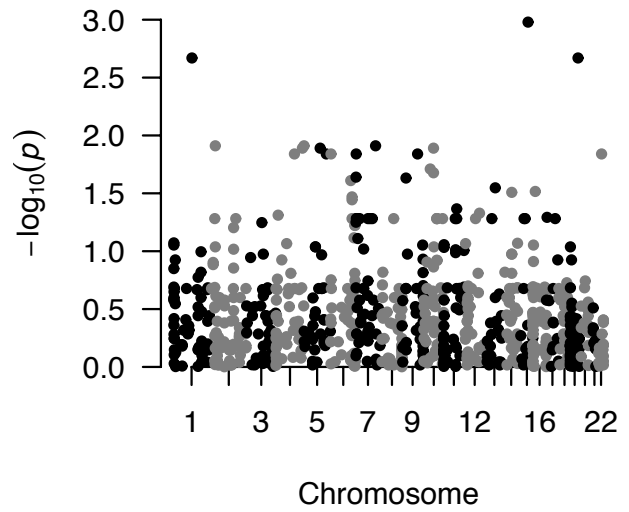

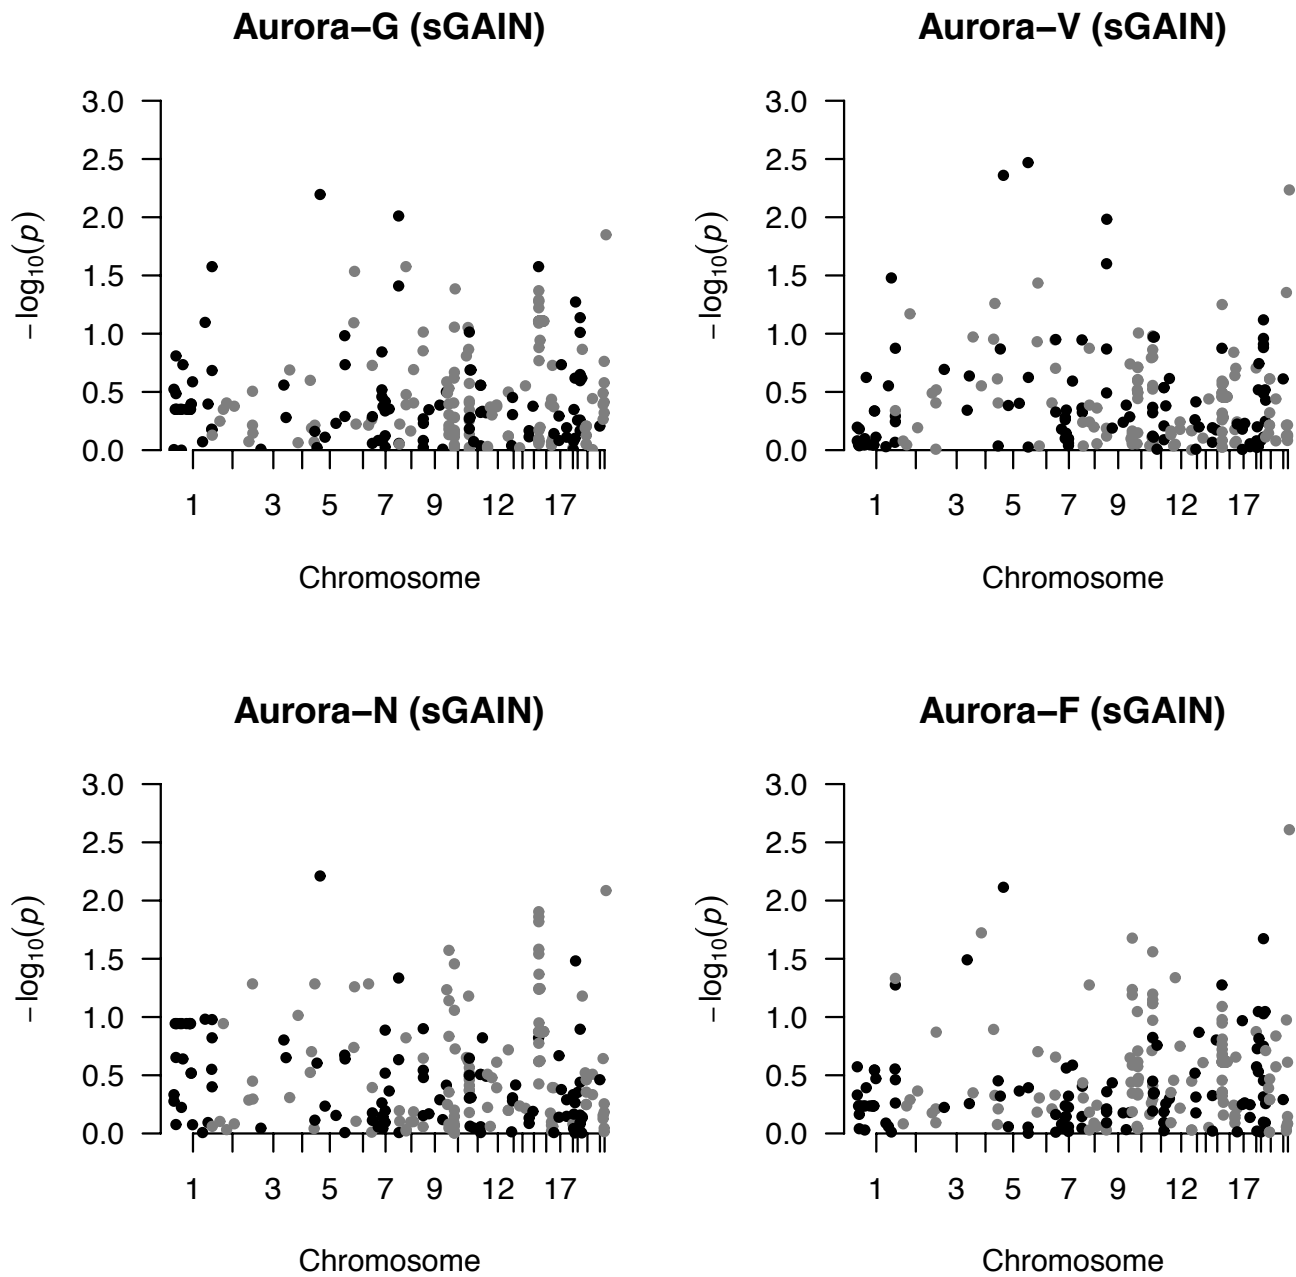

**Supplementary Figure S12.** Manhattan plots for sCNV-based association analysis of Aurora

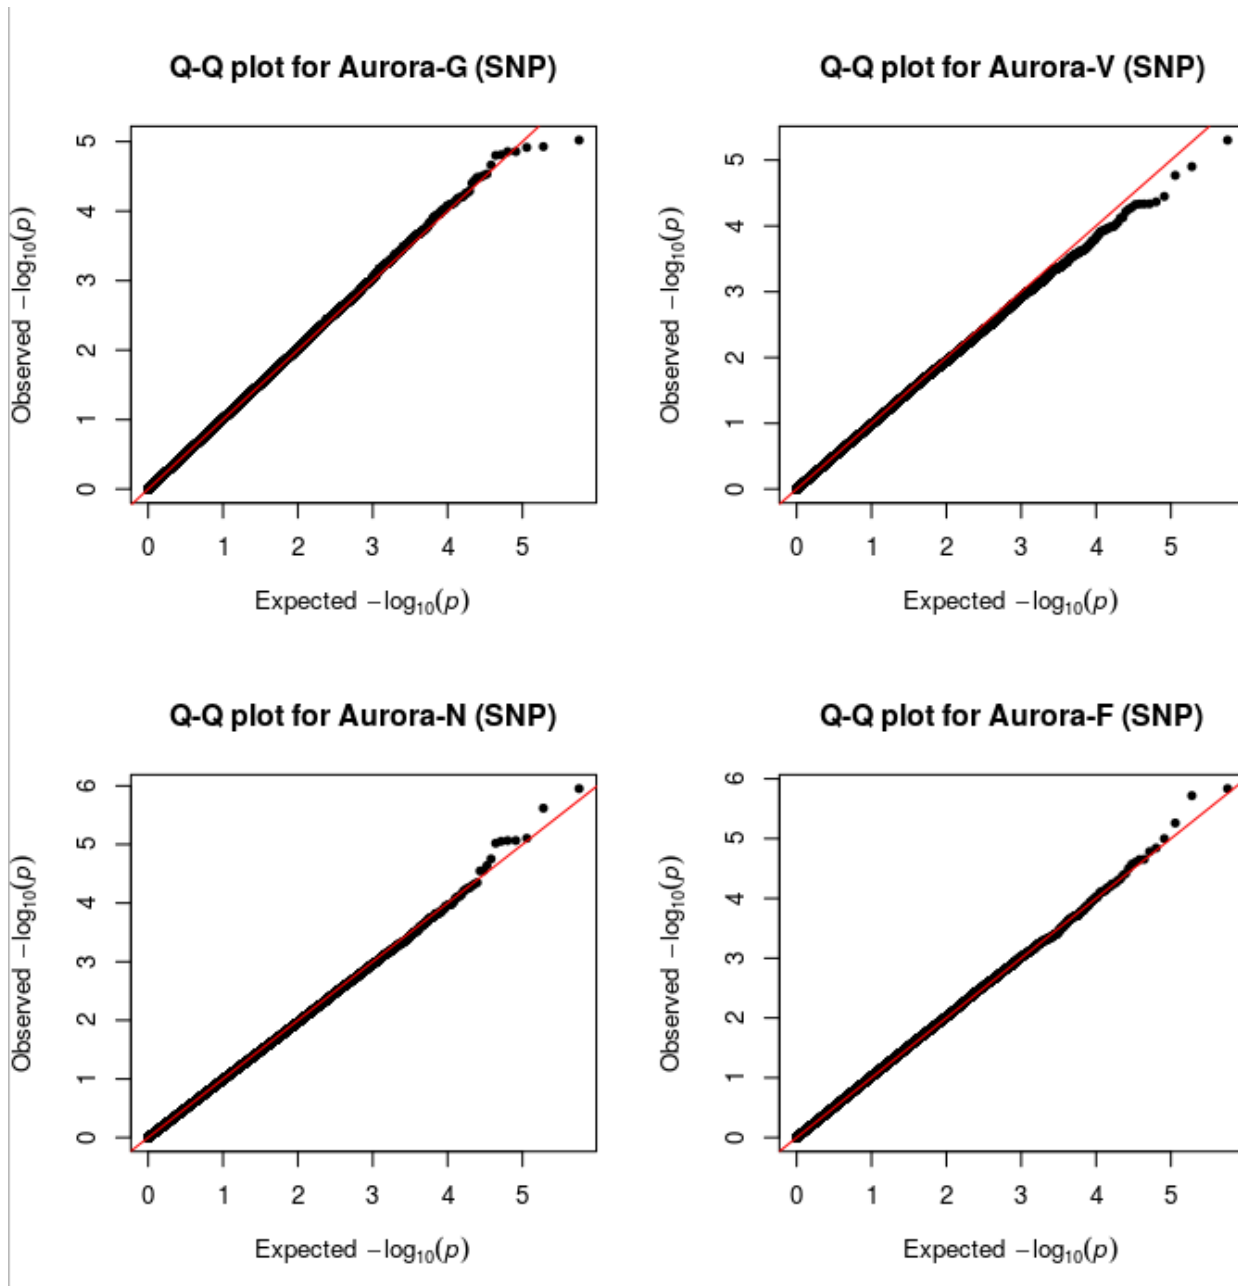

**Supplementary Figure S13.** Q-Q plots for SNP-based association analysis of Aurora

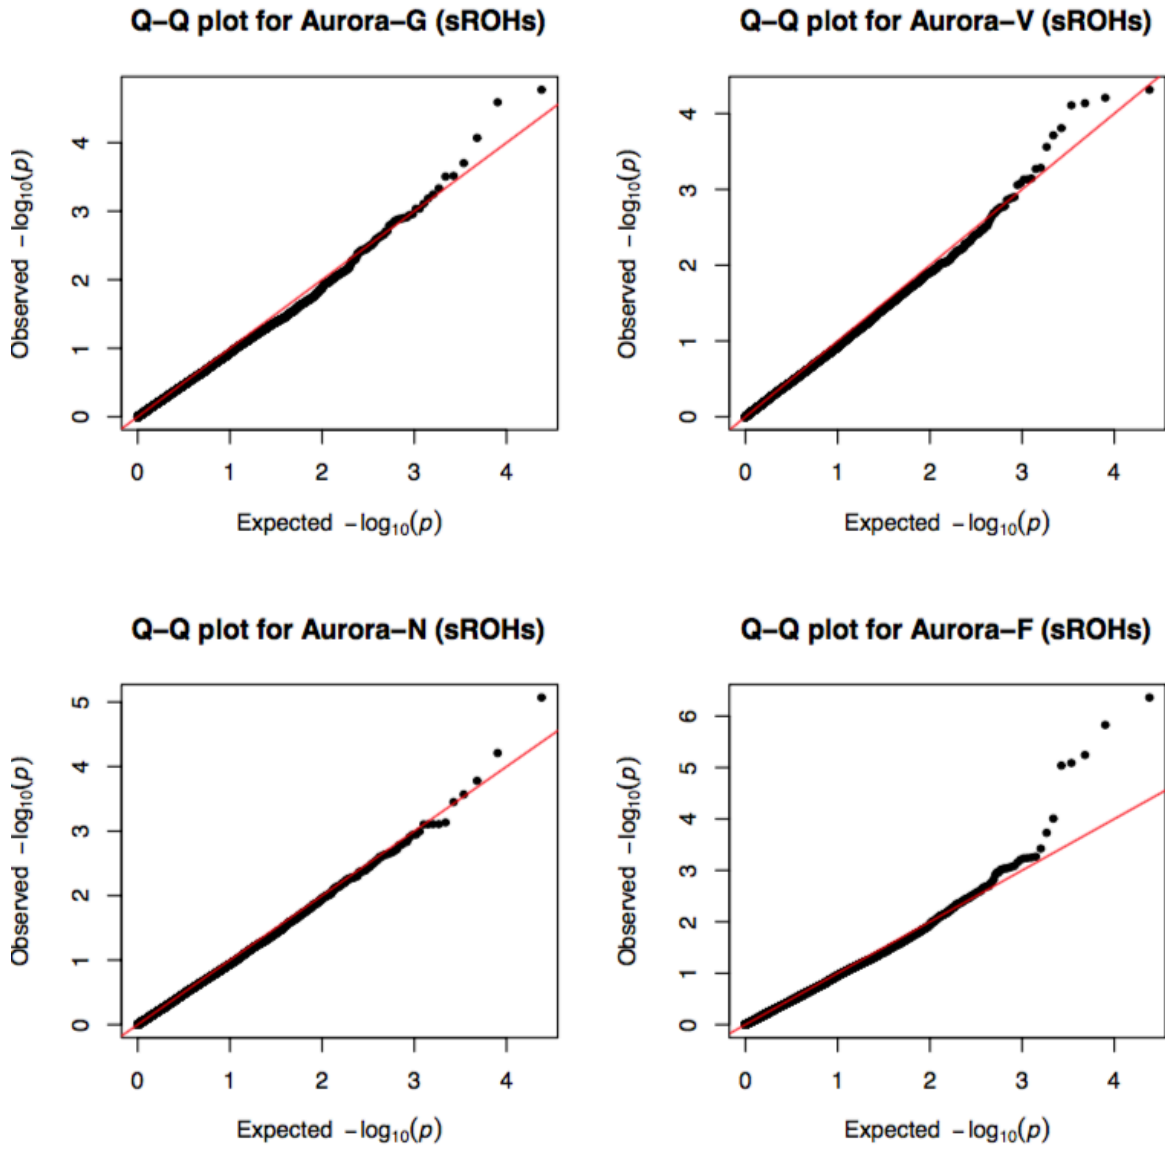

Supplementary Figure S14. Q-Q plots for sROH-based association analysis of Aurora

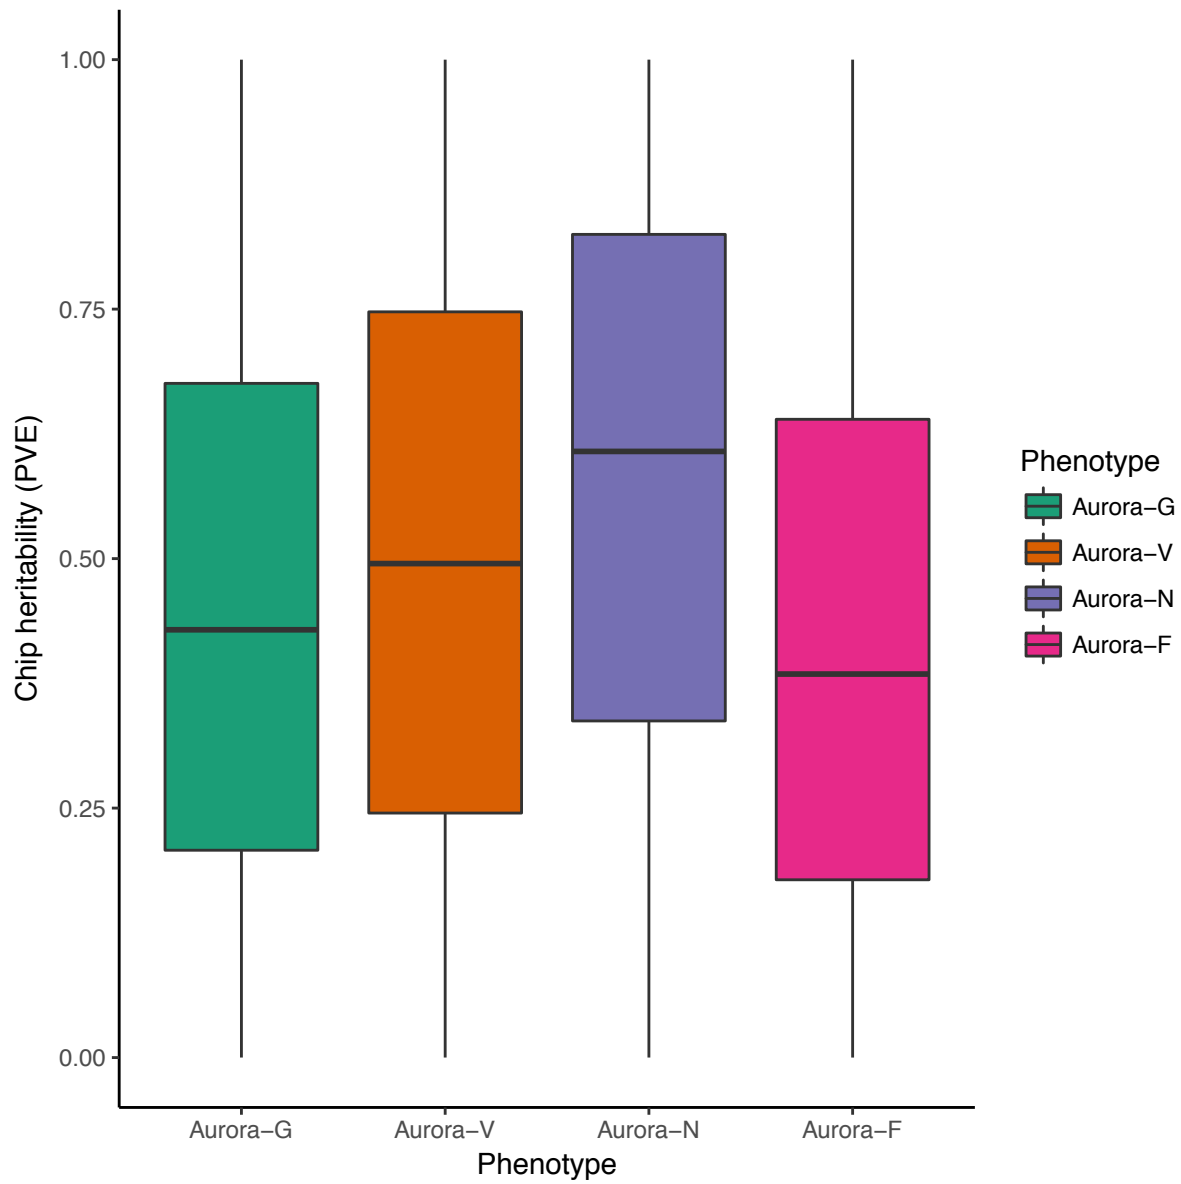

**Supplementary Figure S15.** Boxplots of chip heritability (PVE) estimates from GEMMA for Aurora phenotypes.



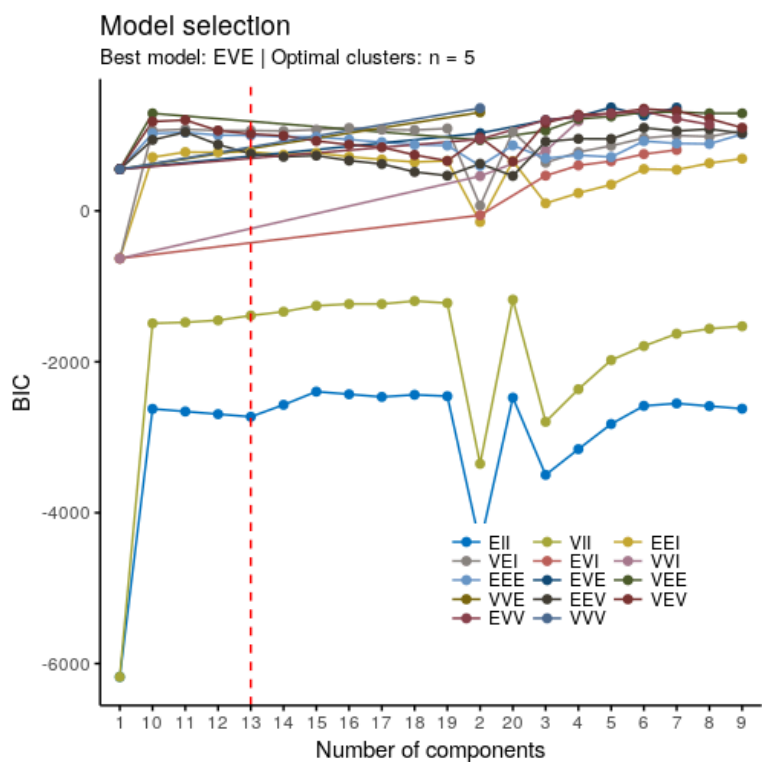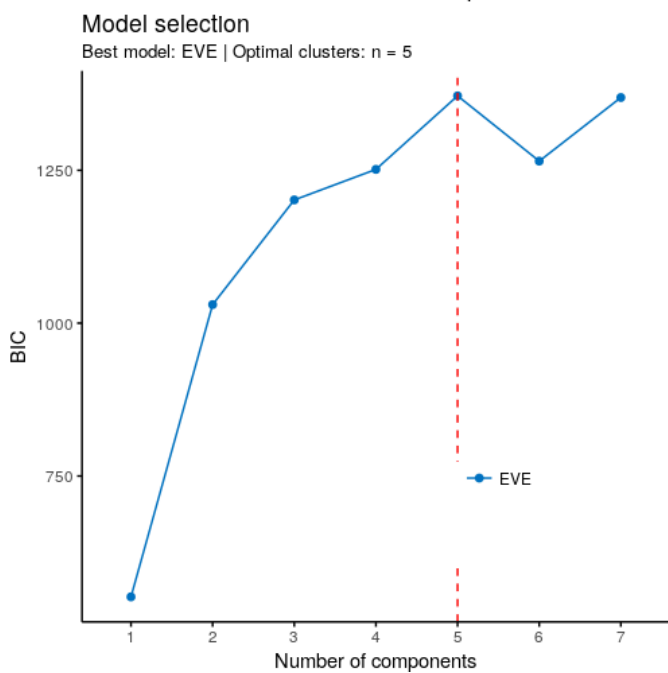

**Supplementary Figure S16.** Bayesian Information Criterion (BIC) values for the range of latent class models estimated using mclust

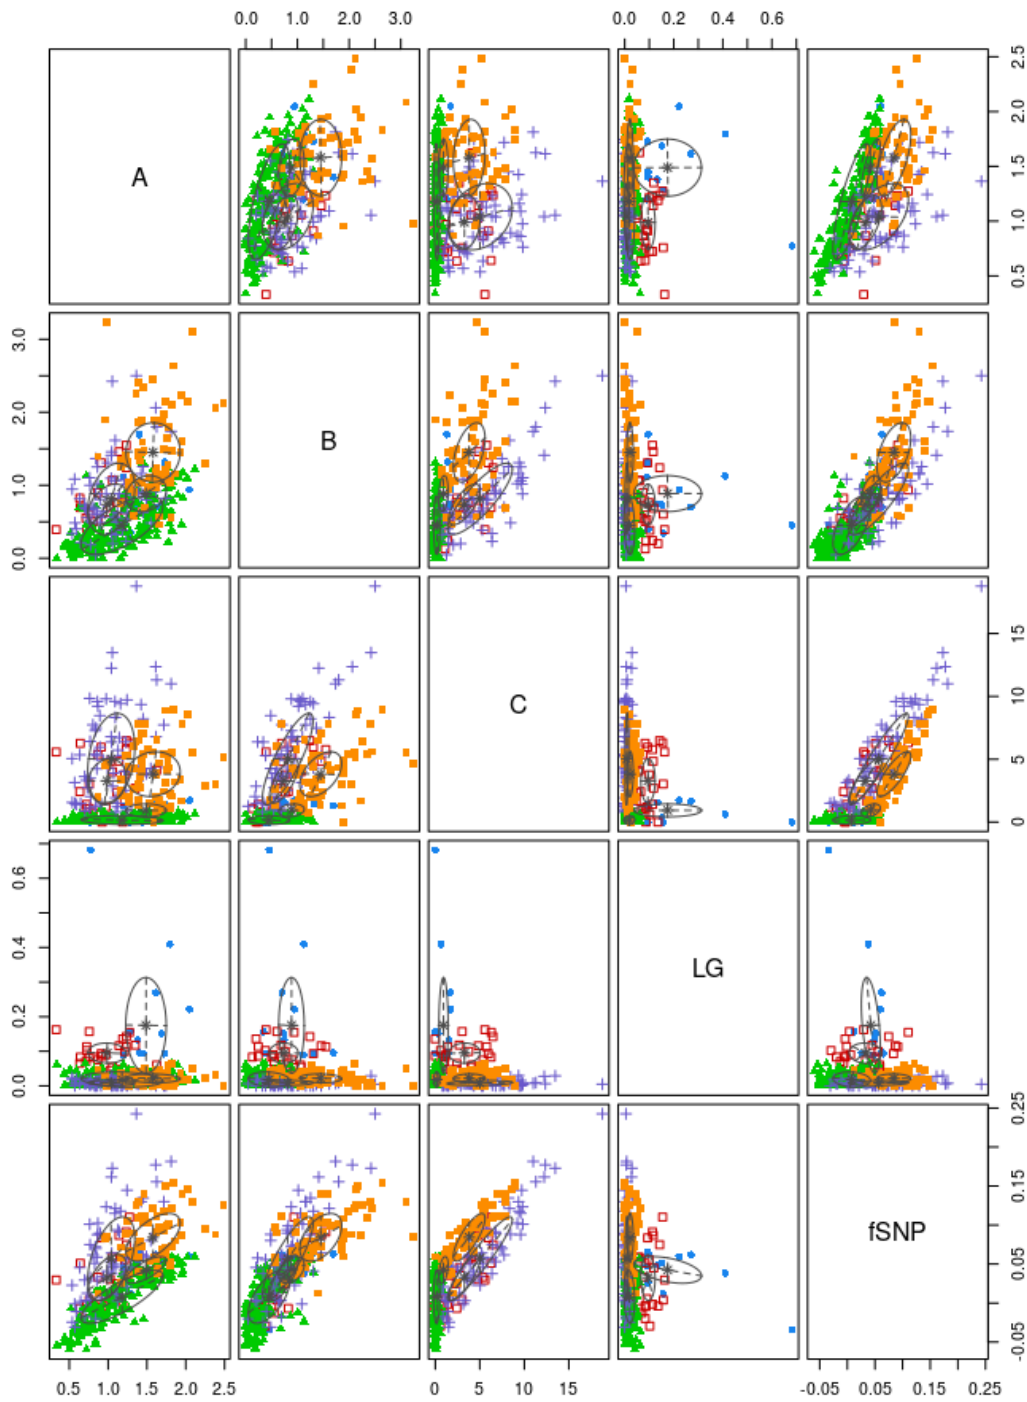

**Supplementary Figure S17.** Classification plot for the results of latent class analysis of homozygosity and CNV burden in the study sample. Colors represent class membership. A: fROH(A), B: fROH(B), C: fROH(C), LG: CNV burden (loss+gain).

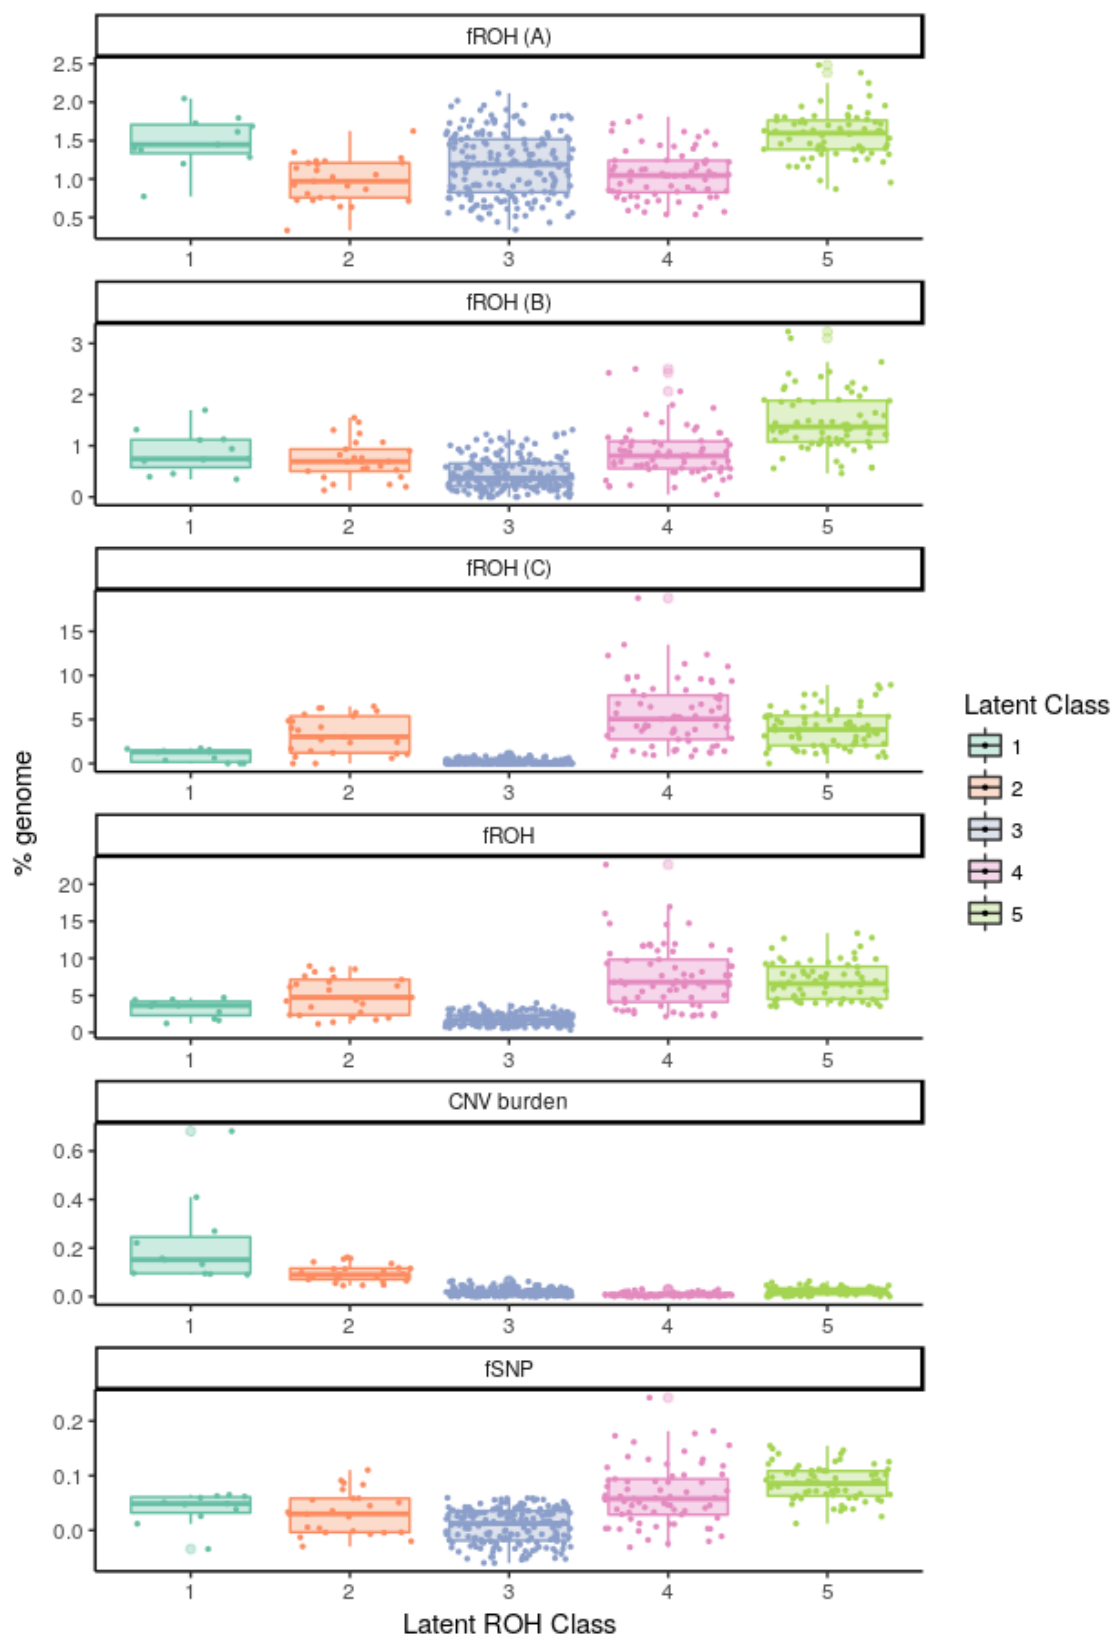

**Supplementary Figure S18.** Distributions of key ROH- and CNV-associated variables among five latent classes of individuals

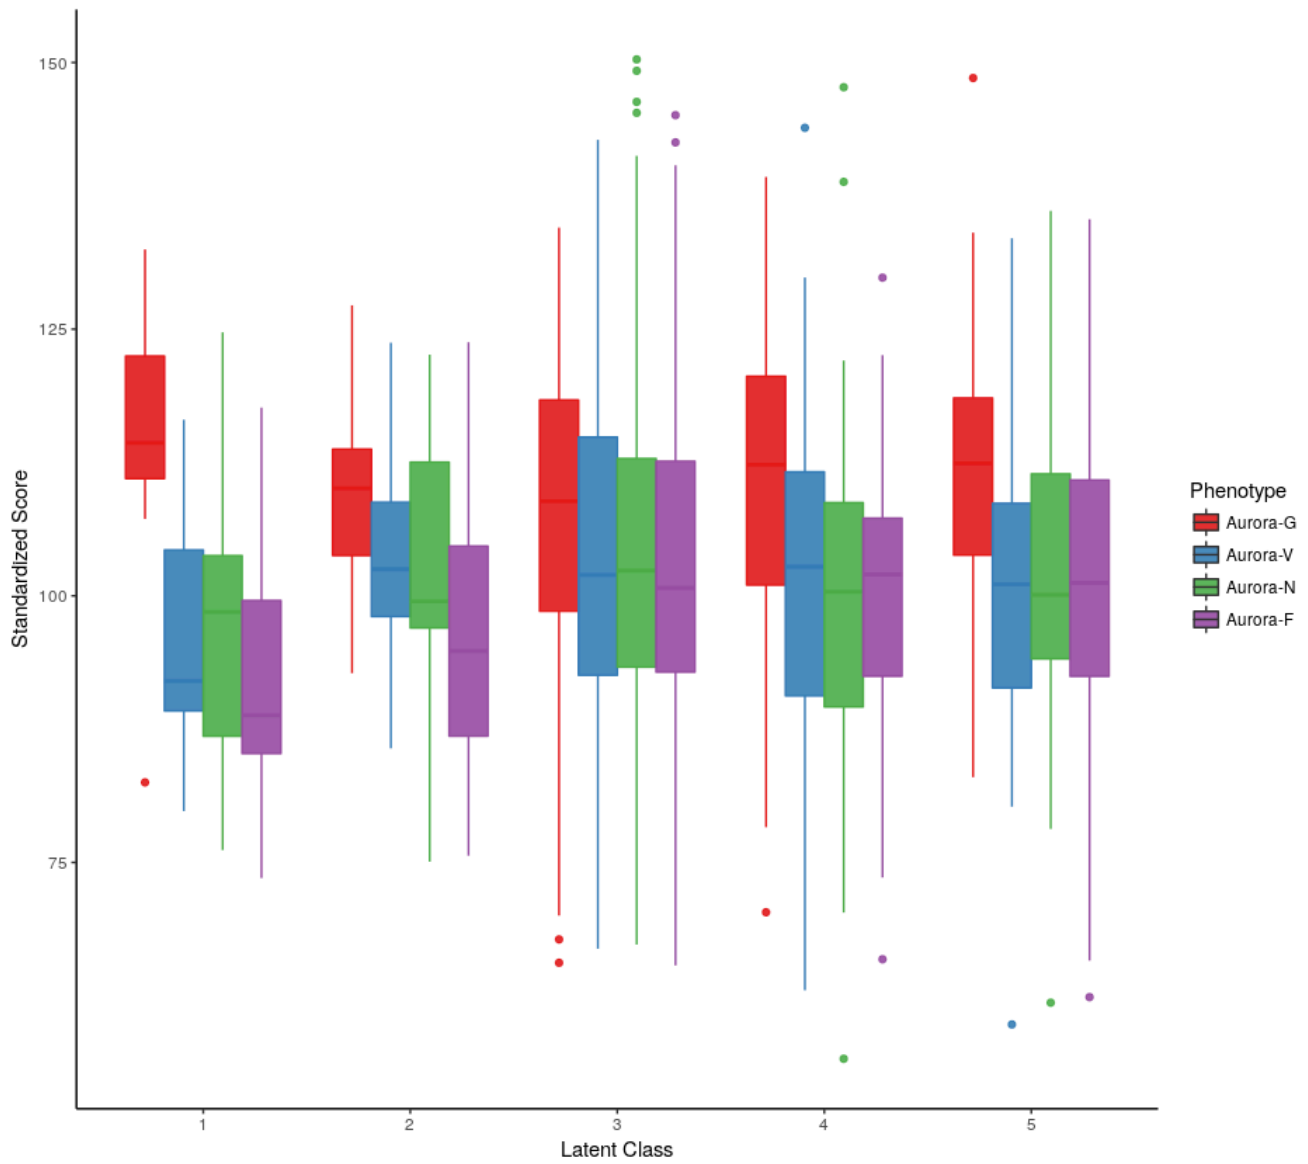

**Supplementary Figure S19.** Distributions of latent general cognitive ability estimates in five latent clusters of individuals

## 7 References

- Alexander, D.H., Novembre, J., and Lange, K. (2009). Fast model-based estimation of ancestry in unrelated individuals. *Genome Research* 19, 1655-1664.
- Bjelland, D.W., Lingala, U., Patel, P.S., Jones, M., and Keller, M.C. (2017). A fast and accurate method for detection of IBD shared haplotypes in genome-wide SNP data. *European Journal of Human Genetics* 25, 617-624.
- Browning, B.L., and Browning, S.R. (2009). A Unified Approach to Genotype Imputation and Haplotype-Phase Inference for Large Data Sets of Trios and Unrelated Individuals. *American Journal of Human Genetics* 84, 210-223.
- Cann, H.M., De Toma, C., Cazes, L., Legrand, M.F., Morel, V., Piouffre, L., Bodmer, J., Bodmer, W.F., Bonne-Tamir, B., Cambon-Thomsen, A., Chen, Z., Chu, J.Y., Carcassi, C., Contu, L., Du, R.F., Excoffier, L., Ferrara, G.B., Friedlaender, J.S., Groot, H., Gurwitz, D., Jenkins, T., Herrera, R.J., Huang, X.Y., Kidd, J., Kidd, K.K., Langaney, A., Lin, A.A., Mehdi, S.Q., Parham, P., Piazza, A., Pistillo, M.P., Qian, Y.P., Shu, Q.F., Xu, J.J., Zhu, S., Weber, J.L., Greely, H.T., Feldman, M.W., Thomas, G., Dausset, J., and Cavalli-Sforza, L.L. (2002). A human genome diversity cell line panel. *Science* 296, 261-262.
- Deelen, P., Bonder, M.J., Van Der Velde, K.J., Westra, H.-J., Winder, E., Hendriksen, D., Franke, L., and Swertz, M.A. (2014). Genotype harmonizer: automatic strand alignment and format conversion for genotype data integration. *BMC Research Notes* 7, 901.
- Gusev, A., Lowe, J.K., Stoffel, M., Daly, M.J., Altshuler, D., Breslow, J.L., Friedman, J.M., and Pe'er, I. (2009). Whole population, genome-wide mapping of hidden relatedness. *Genome Research* 19, 318-326.
- Huff, C.D., Witherspoon, D.J., Simonson, T.S., Xing, J.C., Watkins, W.S., Zhang, Y.H., Tuohy, T.M., Neklason, D.W., Burt, R.W., Guthery, S.L., Woodward, S.R., and Jorde, L.B. (2011). Maximum-likelihood estimation of recent shared ancestry (ERSA). *Genome Research* 21, 768-774.
- Kopelman, N.M., Mayzel, J., Jakobsson, M., Rosenberg, N.A., and Mayrose, I. (2015). Clumpak: a program for identifying clustering modes and packaging population structure inferences across K. *Mol Ecol Resour* 15, 1179-1191.
- Kuismin, M.O., Ahlinder, J., and Sillanpää, M.J. (2017). CONE: Community Oriented Network Estimation Is a Versatile Framework for Inferring Population Structure in Large-Scale Sequencing Data. *G3: Genes|Genomes|Genetics* 7, 3359-3377.
- Li, Y.L., and Liu, J.X. (2018). STRUCTURESELECTOR: A web-based software to select and visualize the optimal number of clusters using multiple methods. *Molecular Ecology Resources* 18, 176-177.
- Liu, H.J., Roeder, K., and Wasserman, D. (2010). Stability Approach to Regularization Selection (Stars) for High Dimensional Graphical Models. *Advances in Neural Information Processing Systems* 23, 1432-1440.
- Matise, T.C., Chen, F., Chen, W.W., De La Vega, F.M., Hansen, M., He, C.S., Hyland, F.C.L., Kennedy, G.C., Kong, X.Y., Murray, S.S., Ziegler, J.S., Stewart, W.C.L., and Buyske, S. (2007). A second-generation combined linkage-physical map of the human genome. *Genome Research* 17, 1783-1786.

- Rodriguez-Flores, J.L., Fakhro, K., Agosto-Perez, F., Ramstetter, M.D., Arbiza, L., Vincent, T.L., Robay, A., Malek, J.A., Suhre, K., Chouchane, L., Badii, R., Al-Marri, A.a.N., Khalil, C.A., Zirie, M., Jayyousi, A., Salit, J., Keinan, A., Clark, A.G., Crystal, R.G., and Mezey, J.G. (2016). Indigenous Arabs are descendants of the earliest split from ancient Eurasian populations. *Genome Research* 26, 151-162.
- Schwender, H., and Ickstadt, K. (2008). "Imputing missing genotypes with weighted k nearest neighbors", in: *Sonderforschungsbereich 475, Komplexitätsreduktion in Multivariaten Datenstrukturen*. (Dortmund: Universität Dortmund).
